# Supplementary material for: Structure-based redesign of docking domain interactions modulates the product spectrum of a rhabdopeptide-synthesizing NRPS
Source: PubMed Central journal article supplement (PMC6195595; doi:10.1038/s41467-018-06712-1), 2018-10-19
Supplement: 41467_2018_6712_MOESM1_ESM.pdf [file 41467_2018_6712_MOESM1_ESM.pdf]

# Supporting information

**Structure-based redesign of docking domain interactions  
modulates the product spectrum of a rhabdopeptide-synthesizing**

**NRPS**

Carolin Hacker, Xiaofeng Cai *et al.*

## Supplementary Figures

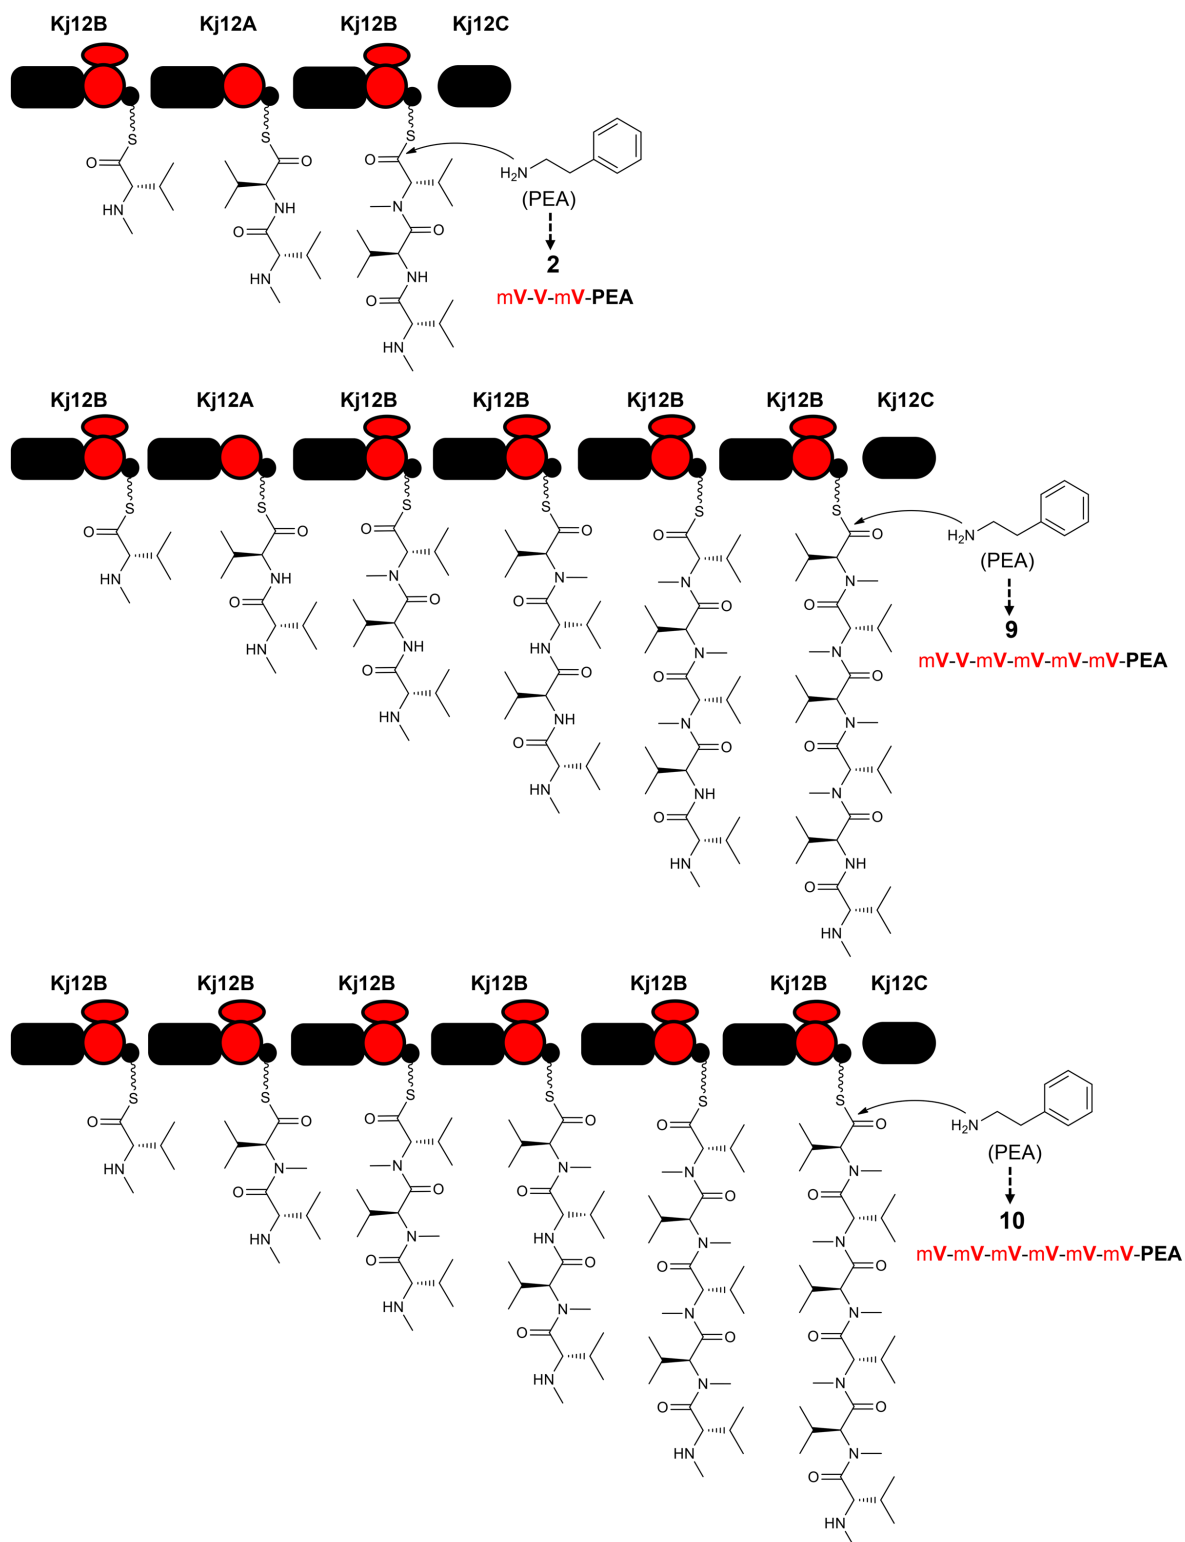

**Supplementary Figure 1.** Selected examples for proposed biosynthetic pathways of selected RXPs produced by Kj12B and Kj12C from *Xenorhabdus stockiae* KJ12.1.

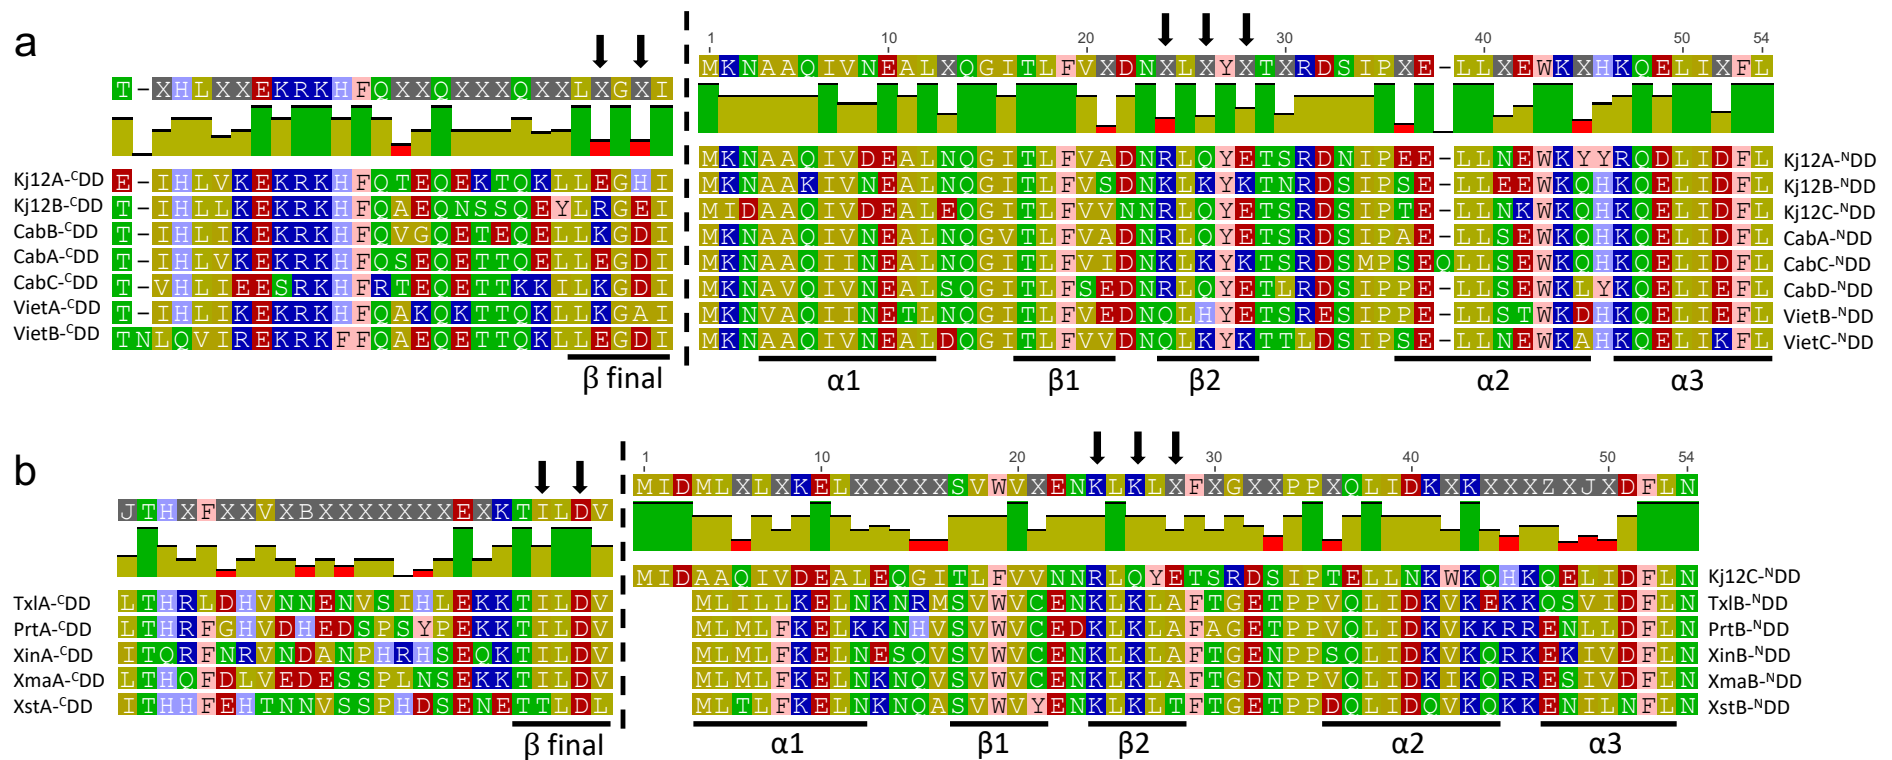

**Supplementary Figure 2. Alignment of selected NRPS<sup>-cDD</sup> and <sup>-NDD</sup>s identified by BLASTP search using Kj12C<sup>-NDD</sup> as query sequence.** Secondary structural elements are indicated below. Arrows indicate key residue positions in charge of mediating <sup>cDD</sup>-to- <sup>-NDD</sup> specific interaction as part of an anti-parallel  $\beta$ -sheet secondary structure arrangement. **a**, Alignment of *Xenorhabdus* RXP NRPS-DDs (CabCD, *X. cabanillasii*; VietABC, *X. vietnamensis*)<sup>1</sup> **b**, Alignment of closely related but non-RXP NRPS<sup>-cDD</sup>s and <sup>-NDD</sup>s from *Xenorhabdus* strains showing similar structures as Kj12C<sup>-NDD</sup> connecting NRPS subunits carrying C-terminal epimerization (E) to N-terminal condensation (C) domains. PrtAB from *X. doucetiae*; Xma, *X. mauleonii*; Xin, *X. innexii*; and Xst, *X. stockiae*<sup>2</sup>, TxIAB (TaxIllaidd)<sup>3</sup>. The consensus alignment is depicted above the alignment sequences with a  $\geq 75\%$  threshold implemented. Alignments were performed using the multiple alignment program MUSCLE (default parameters)<sup>4,5</sup>.

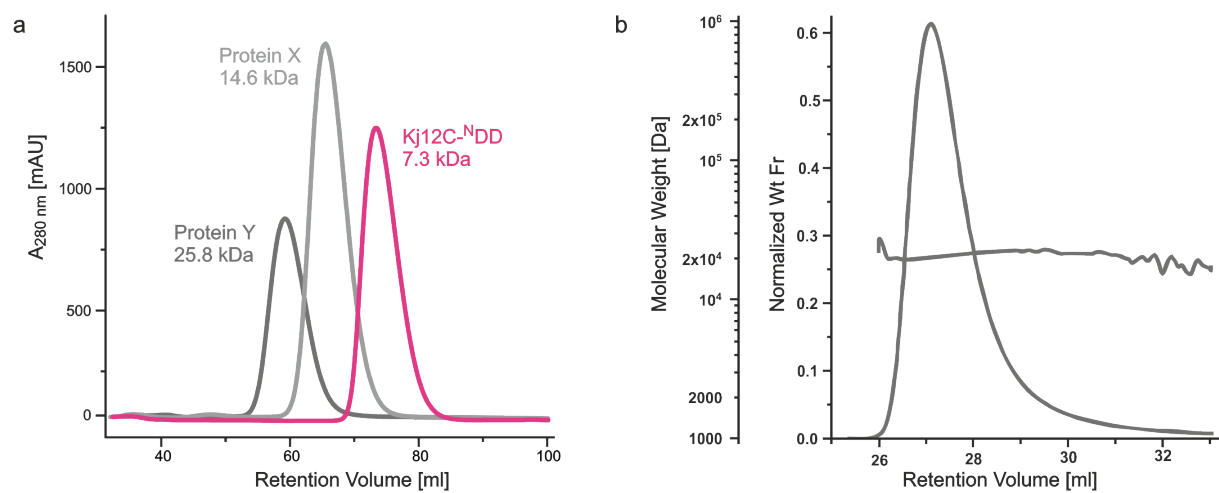

**Supplementary Figure 3. Kj12C-<sup>N</sup>DD is a monomeric protein.** **a**, the different size exclusion chromatography runs on a HiPrep 16/60 Sephacryl S-100 column (GE Healthcare) in 50 mM NaPP pH6.5 with 100 mM NaCl. For comparison with the 7.3 kDa Kj12C-<sup>N</sup>DD (magenta) two larger monomeric proteins were used (Nisl<sub>2-226</sub> 25.8 kDa in dark gray and Nisl<sub>97-226</sub> 14.6 kDa in light gray).<sup>6</sup> **b**, size exclusion chromatography with multi angle light scattering of Kj12C-<sup>N</sup>DD in the same buffer as in (a) on a Superdex 75 10/300 GL column (GE Healthcare) with a calculated MW of 7.189 kDa.



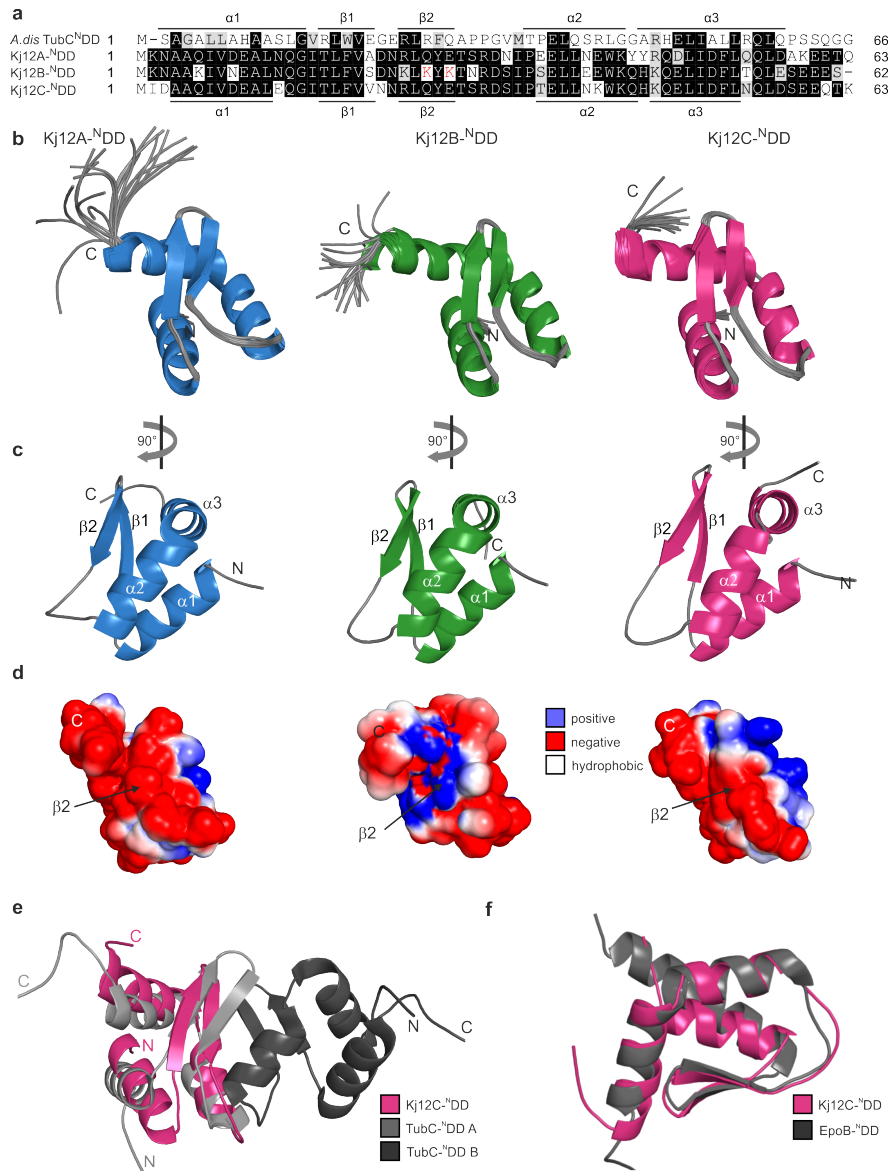

**Supplementary Figure 4. N-terminal docking domains have the same three-dimensional structure.** **a**, Structure based sequence alignment of the TubC<sup>NDD</sup> and the N-terminal docking domains of Kj12A-C. Identical residues are highlighted with *dark grey boxes* and residues with similar chemical properties are shown in *light grey boxes*. The secondary structure based on structural information for TubC<sup>NDD</sup> and Kj12C<sup>NDD</sup> are indicated *above* and *below* the sequence. **b**, Solution structure bundle of the 19 lowest energy conformers and the regularized mean structure for Kj12A<sup>NDD</sup> (blue), Kj12B<sup>NDD</sup> (green) and Kj12C<sup>NDD</sup> (magenta). **c**, Cartoon representations of the energy minimized mean structures of Kj12A-C<sup>NDD</sup>s with the same color-coding as in **b** rotated by 90°. **d**, Electrostatic surface potentials of each <sup>NDD</sup> mapped on the solvent accessible surfaces in the same orientation as in **b** with negatively charged surface areas coloured in *red*, positively charged areas coloured in *blue* and *white* areas corresponding to hydrophobic surfaces. **e**, Overlay of the energy minimized mean structure of Kj12<sup>NDD</sup> from this work (magenta) with one monomer of the TubC<sup>NDD</sup> structure (PDB code 2jug).<sup>7</sup> **f**, Overlay of the energy minimized mean structure of Kj12C<sup>NDD</sup> from this work (magenta) with the crystal structure of the monomeric EpoBcy with the N-terminal docking domain in light grey (PDB code 5t81 chain A).<sup>8</sup>

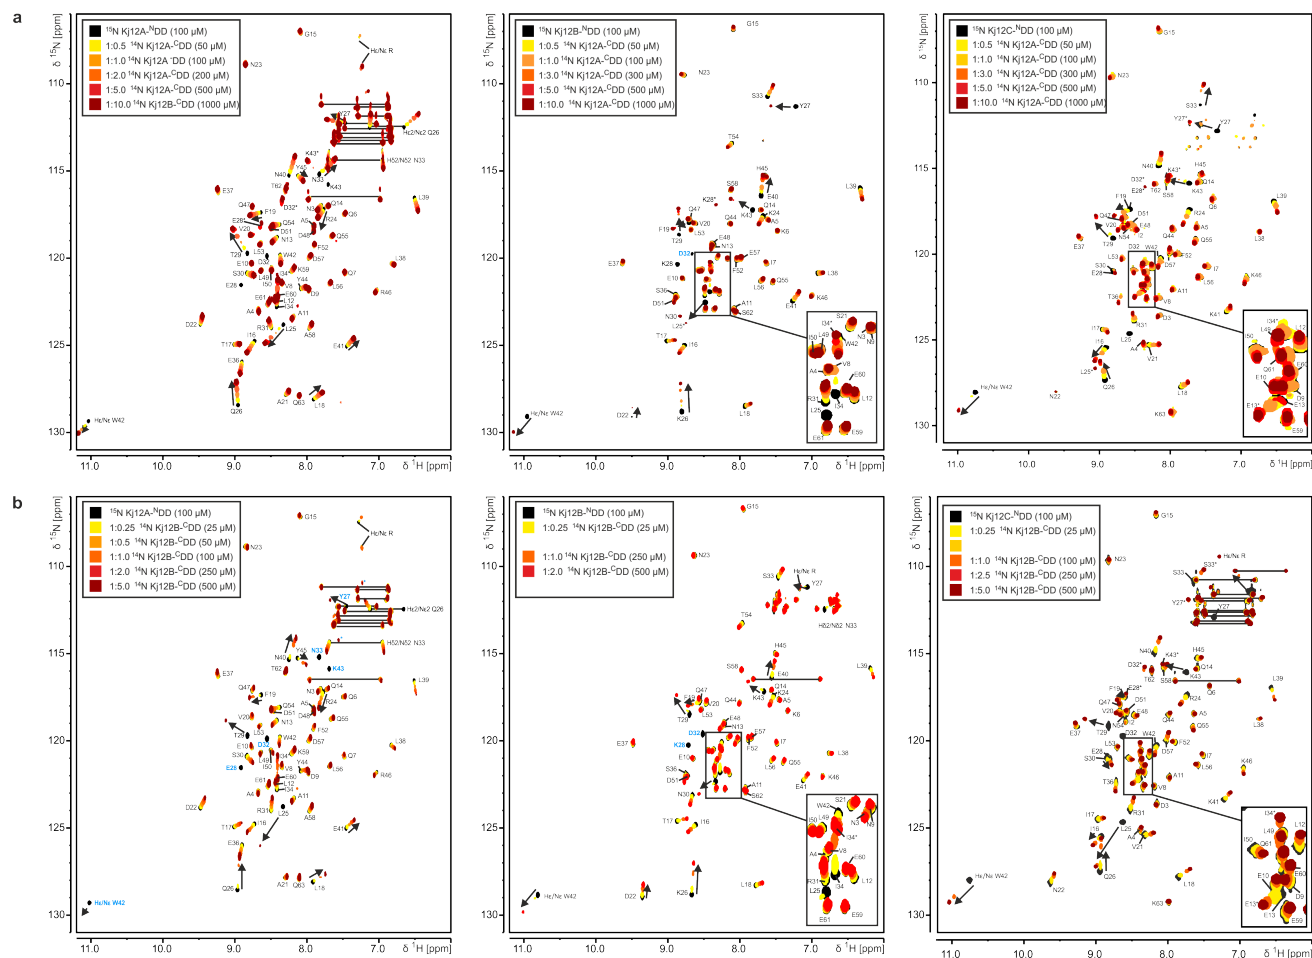

**Supplementary Figure 5.  $^1\text{H}$ ,  $^{15}\text{N}$ -HSQC spectra of docking domain titration. a**, 100  $\mu\text{M}$   $^{15}\text{N}$  labeled Kj12A- $^{\text{NDD}}$  (left), Kj12B- $^{\text{NDD}}$  (middle) and Kj12C- $^{\text{NDD}}$  (right) with increasing amounts of  $^{14}\text{N}$  Kj12A- $^{\text{CDD}}$  (50  $\mu\text{M}$  yellow, 100  $\mu\text{M}$  light orange, 300  $\mu\text{M}$  dark orange, 500  $\mu\text{M}$  red, and 1000  $\mu\text{M}$  dark red, not every step was recorded for all  $^{\text{NDD}}$ s. Direction of peak shifting is indicated with arrows for some peaks. Possible bound state peaks are indicated with asterisk. **b**, 100  $\mu\text{M}$   $^{15}\text{N}$  labeled Kj12A- $^{\text{NDD}}$  (left), Kj12B- $^{\text{NDD}}$  (middle) and Kj12C- $^{\text{NDD}}$  (right) with increasing amounts of  $^{14}\text{N}$  Kj12B- $^{\text{CDD}}$  (25  $\mu\text{M}$  yellow, 50  $\mu\text{M}$  light orange, 100  $\mu\text{M}$  dark orange, 250  $\mu\text{M}$  red, and 500  $\mu\text{M}$  dark red, not every step was recorded for all  $^{\text{NDD}}$ s. The directions of peak shifts are indicated with arrows for some peaks. For Kj12A- $^{\text{NDD}}$  and Kj12B- $^{\text{NDD}}$  peaks in intermediate exchange are indicated with blue residue numbers for those peaks where the bound state could not be assigned unambiguously. Putative bound state peaks are indicated with asterisks. For Kj12C- $^{\text{NDD}}$  all bound state peaks could be assigned in comparison with the spectrum of the two covalently linked domains (Kj12C- $^{\text{NDD}}$ -12xGS-Kj12B- $^{\text{CDD}}$ ).

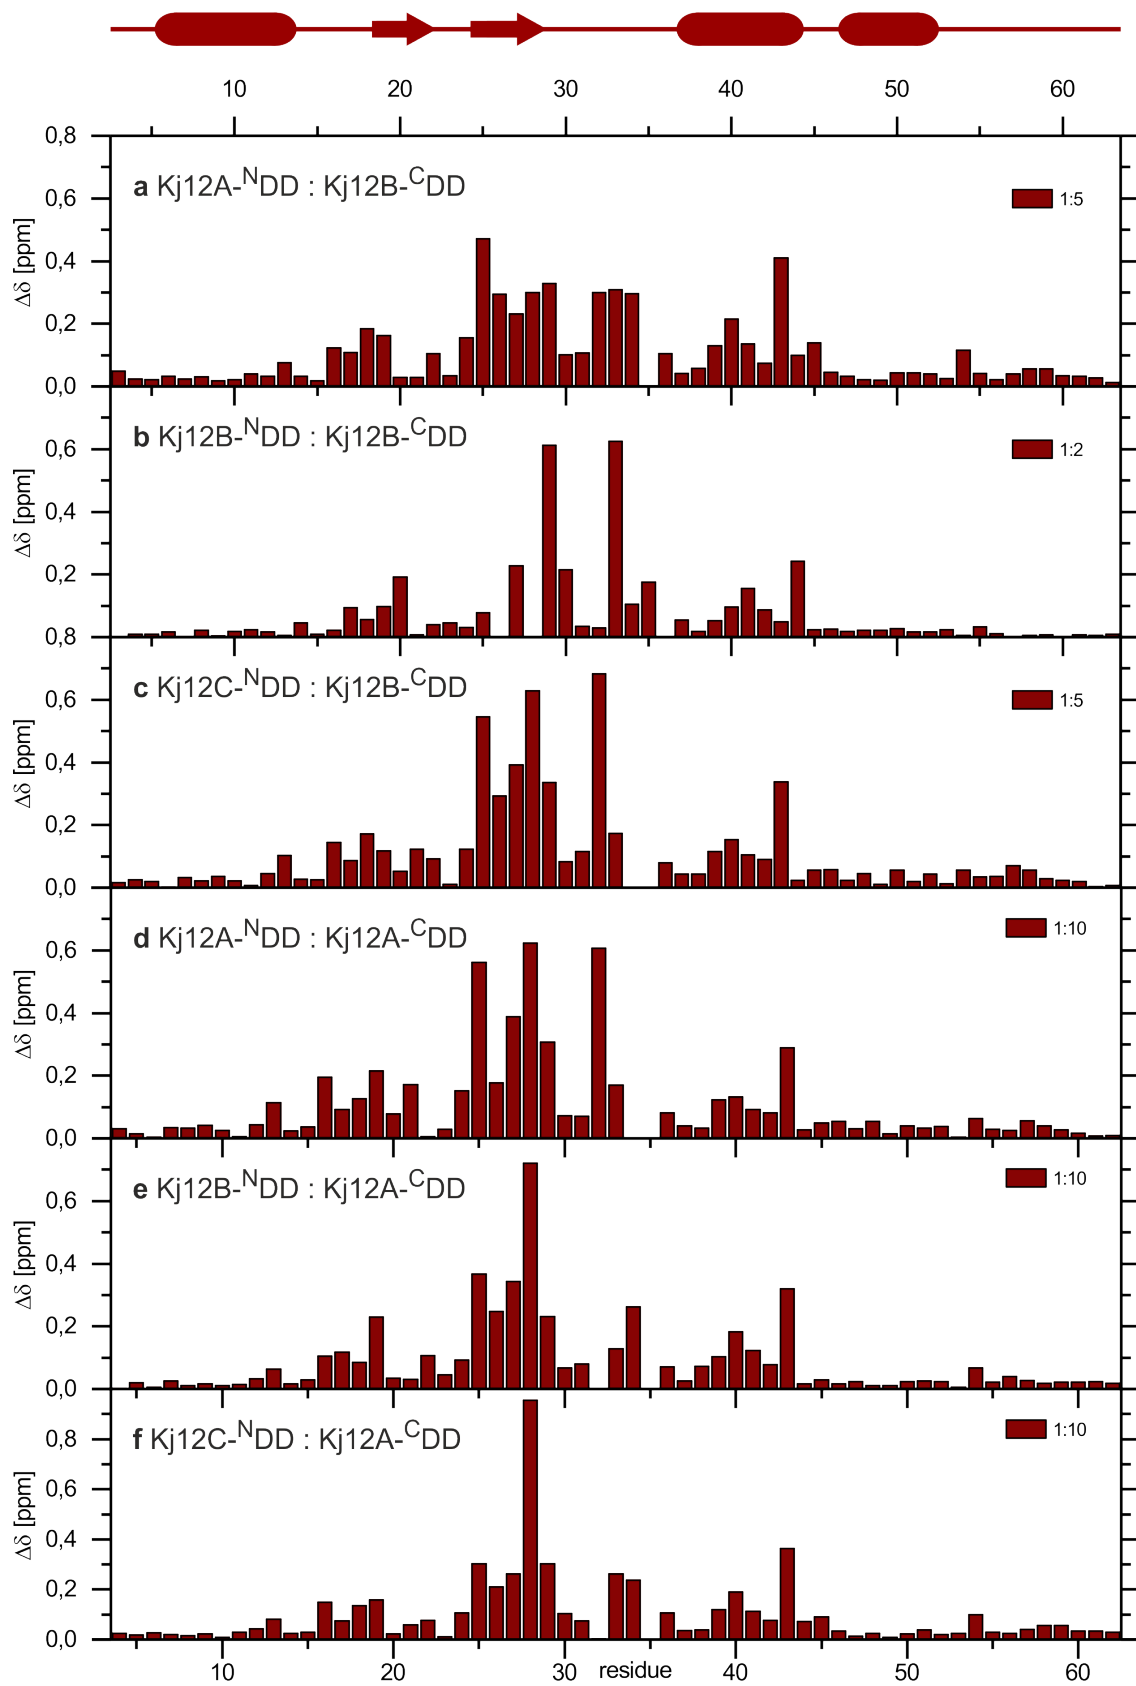

**Supplementary Figure 6.** Histogram of the chemical shift differences of the N-terminal docking domains of Kj12A, Kj12B and Kj12C upon addition of 5 equivalents of Kj12B-<sup>C</sup>DD (a-c) and Kj12A-<sup>C</sup>DD (d-f).

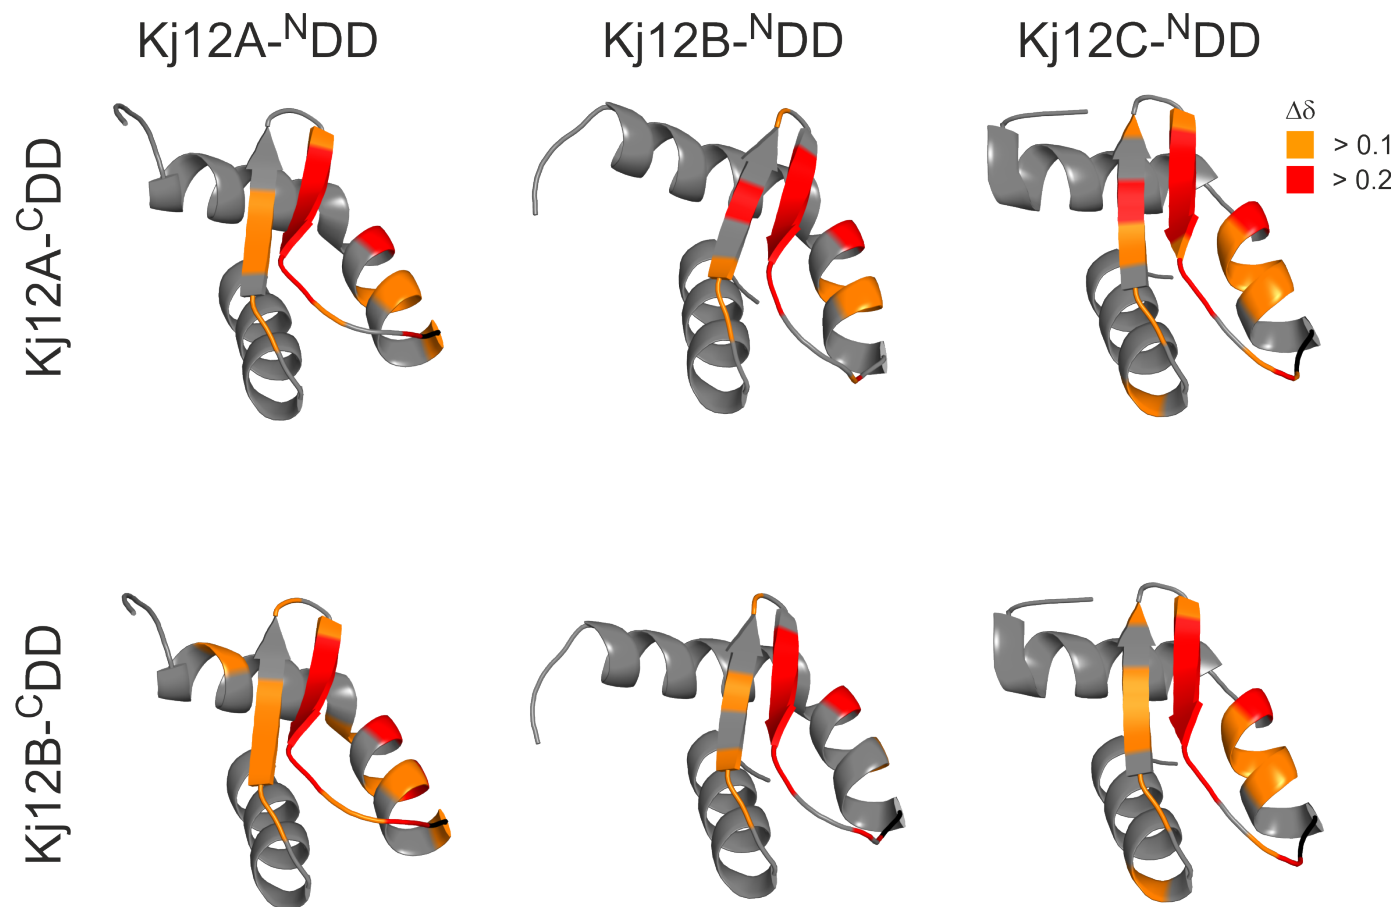

**Supplementary Figure 7. Large chemical shift changes of docking domain titrations mapped on <sup>N</sup>DD structures.** Large chemical shift changes upon addition of unlabeled K<sub>j</sub>12A-<sup>C</sup>DD in 10-fold excess mapped onto the structures of <sup>N</sup>DDs (upper panel) and of K<sub>j</sub>12B-<sup>C</sup>DD in 5-fold excess mapped onto the structures of <sup>N</sup>DDs (lower panel), unassigned residues are indicated in black.

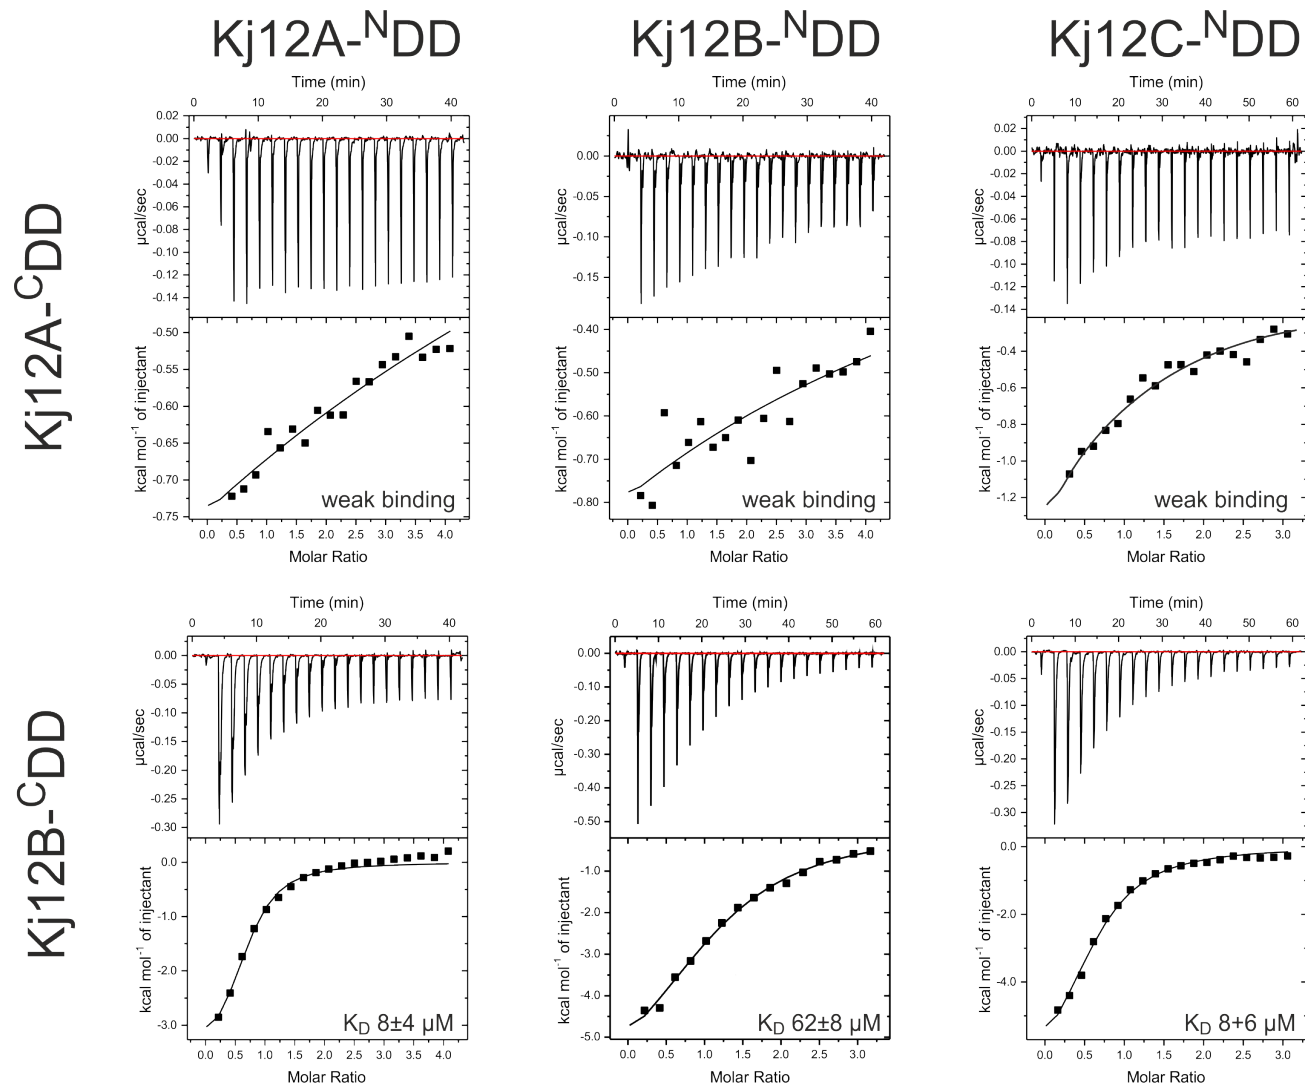

**Supplementary Figure 8. Docking domain titrations with ITC.** ITC thermograms and the derived binding curves for titrations of 50  $\mu$ M NDDs in 50 mM NaPP<sub>i</sub>, pH 6.5, 100 mM NaCl with CDDs. The  $K_D$ s for Kj12A-CDD could not be measured reliably with ITC due to the low binding affinities (upper panel). The  $K_D$ s for Kj12B-CDD were measured in triplicates (lower panel).

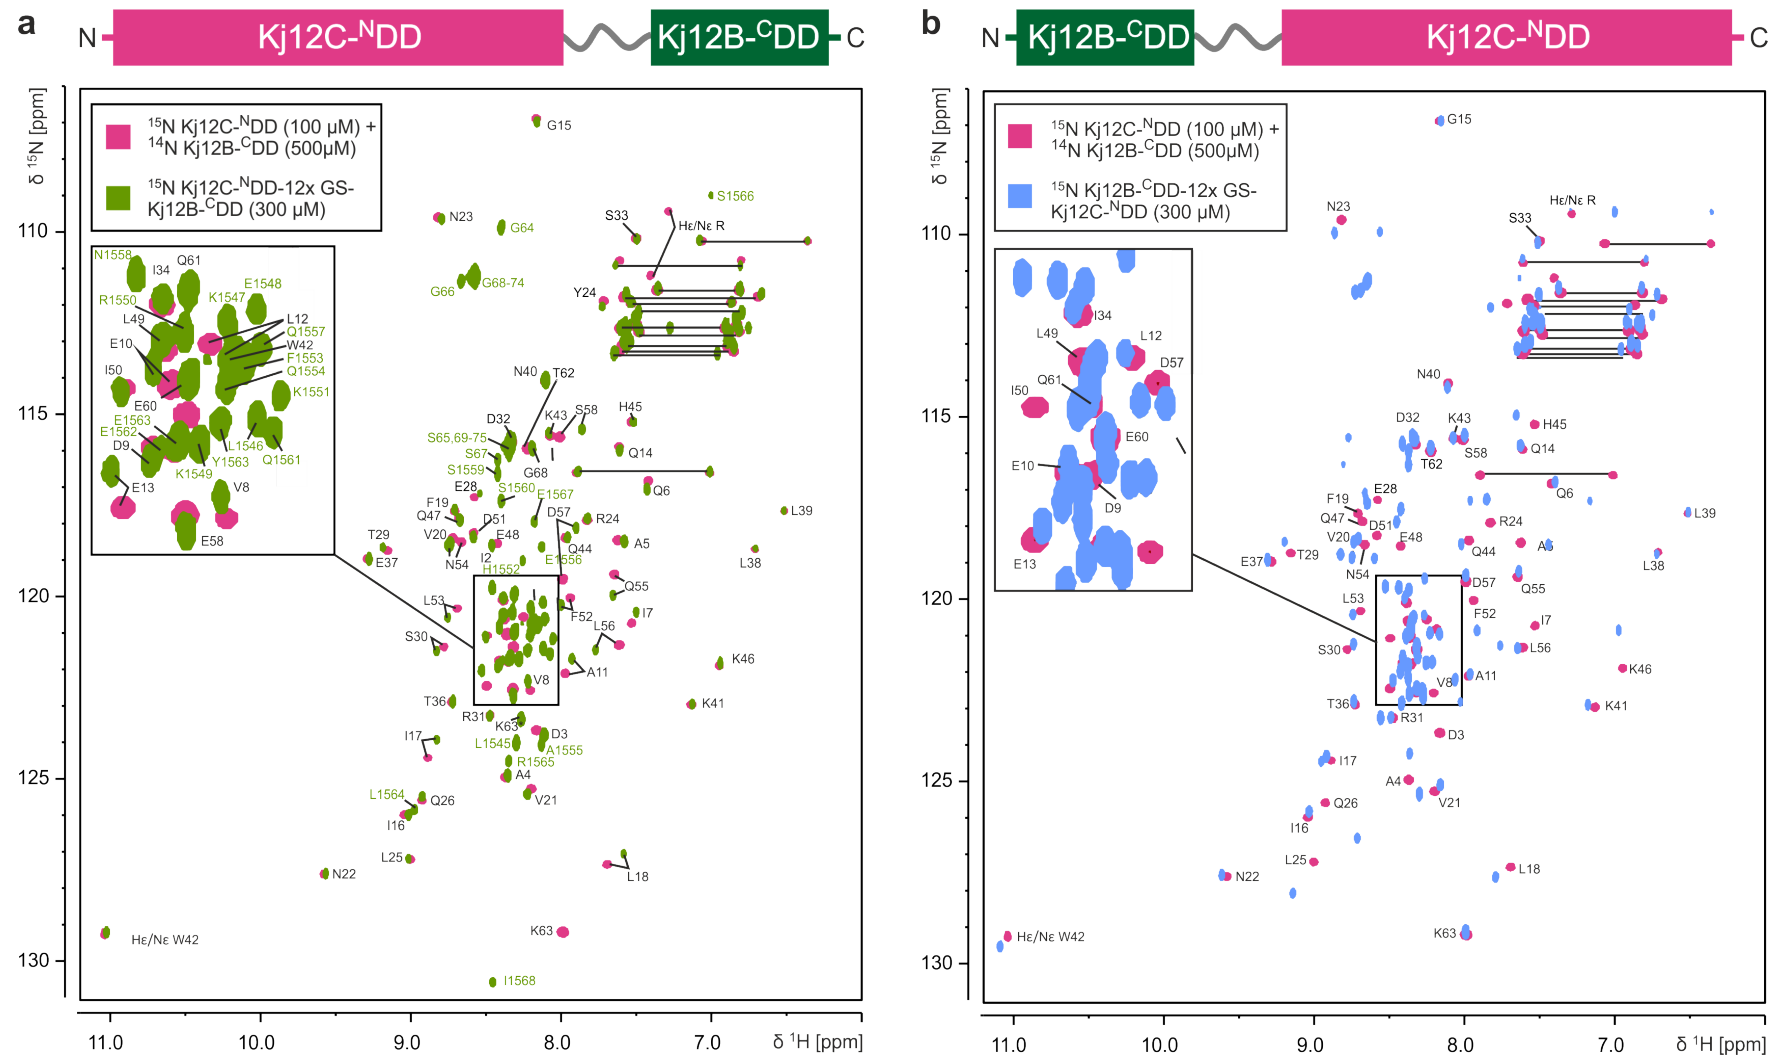

**Supplementary Figure 9. Comparison of <sup>1</sup>H, <sup>15</sup>N-HSQC spectra of different linker constructs.** <sup>1</sup>H, <sup>15</sup>N-HSQC spectra of titration endpoint (ratio 1:5) of Kj12C-<sup>14</sup>NDD with Kj12B-<sup>14</sup>DD (red) overlaid with Kj12C-<sup>14</sup>NDD-12xGS-Kj12B-<sup>14</sup>DD (green) in (a) and Kj12B-<sup>14</sup>DD-12xGS-Kj12C-<sup>14</sup>NDD (blue) in (b). Schematic representations of linker constructs are indicated above.

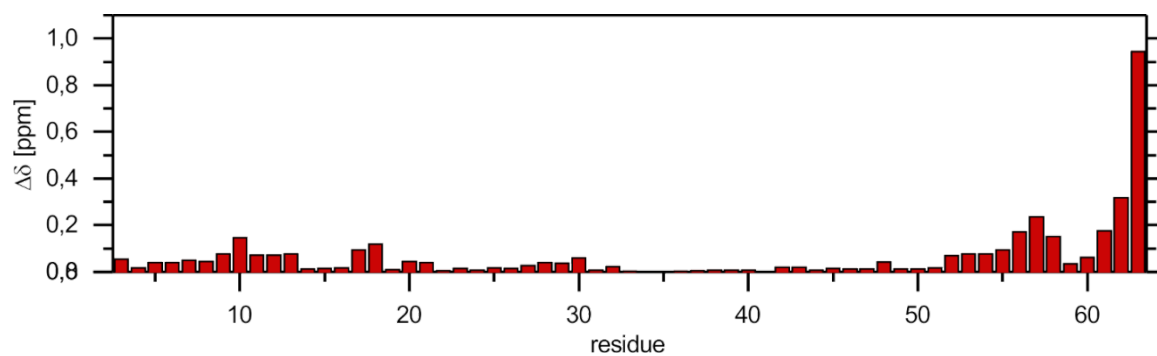

**Supplementary Figure 10. Histogram of the chemical shift differences.** Comparison of the  $^1\text{H}$ ,  $^{15}\text{N}$  HSQC spectra of the N-terminal docking domain of K<sub>j</sub>12C bound to K<sub>j</sub>12B-<sup>c</sup>DD in trans (1:5 ratio, titration endpoint) and the covalently linked domains (K<sub>j</sub>12C-<sup>N</sup>DD-12xGS-K<sub>j</sub>12B-<sup>c</sup>DD).

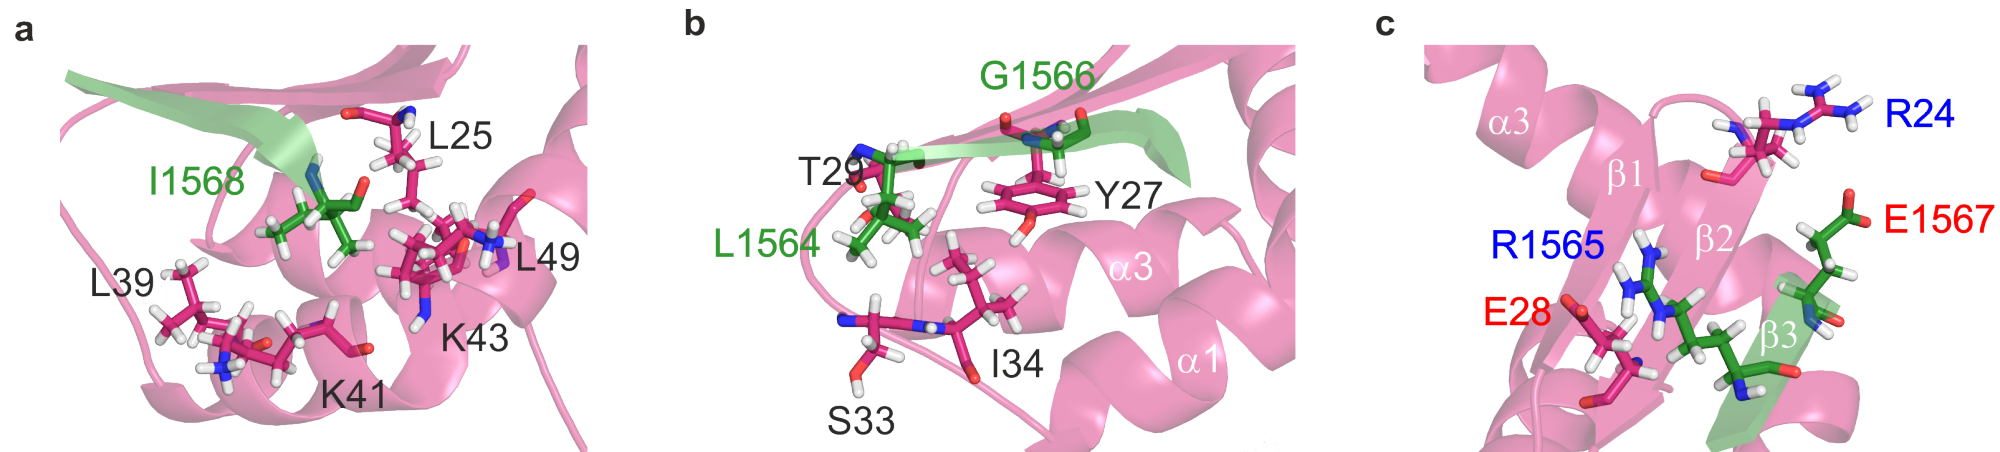

**Supplementary Figure 11. Key residues of the <sup>N</sup>DD-<sup>C</sup>DD complex.** Complex structure of KJ12C <sup>N</sup>DD (magenta) and KJ12B <sup>C</sup>DD (green) with structural important residues are shown in stick representation. **a**, I1568 of KJ12B-<sup>C</sup>DD is buried in a hydrophobic pocket formed by residues of helix  $\alpha 2$  and  $\alpha 3$ . **b**, L1564 of KJ12B-<sup>C</sup>DD is buried in a hydrophobic pocket formed by residues of loop 2 and Y27 stacks under G1566. **c**, Two salt bridges are formed between R24 and E1567 and between E28 and R1565.



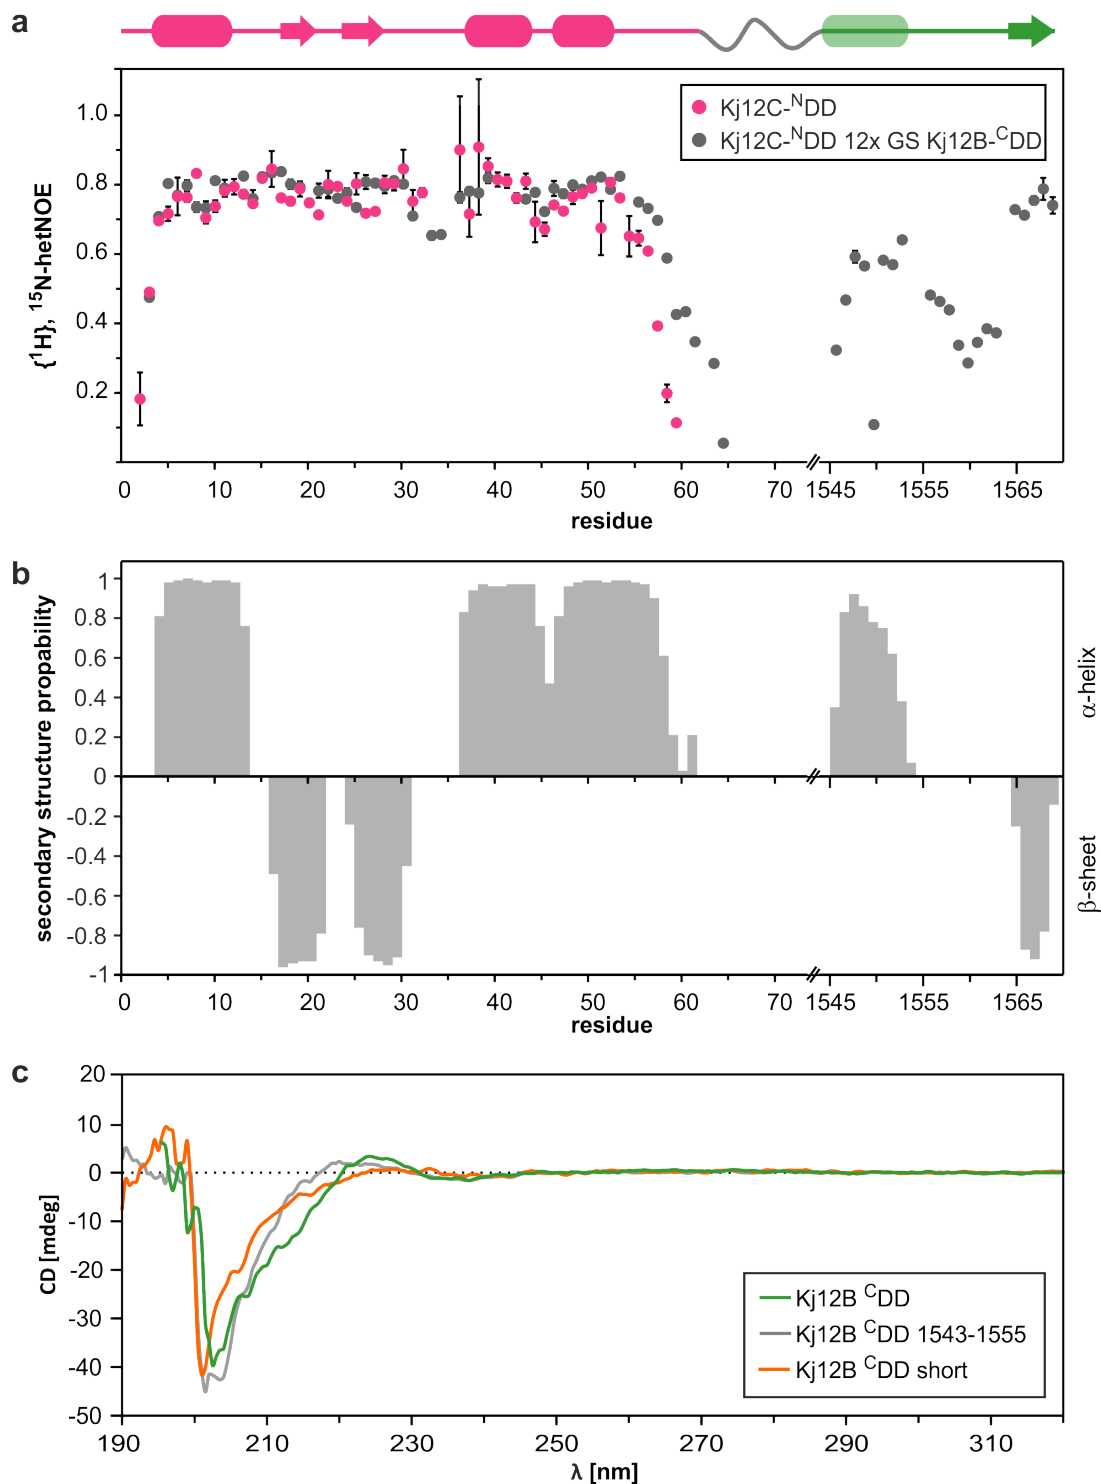

**Supplementary Figure 12.  $^1\text{H}$ ,  $^{15}\text{N}$ -hetNOE measurements, secondary structure probability and CD measurements.** **a**, Values of hetNOE measurements of KJ12C-<sup>N</sup>DD 12xGS KJ12B-<sup>C</sup>DD complex (grey) overlaid with free KJ12C-<sup>N</sup>DD (magenta) plotted onto the sequence. Secondary structure elements derived from structure calculation are indicated on top. **b**, Secondary structure probability of the KJ12C-<sup>N</sup>DD 12xGS KJ12B-<sup>C</sup>DD complex as derived from backbone chemical shifts using the program TalosN. **c**, CD spectroscopic analysis of KJ12B-<sup>C</sup>DD, KJ12B-<sup>C</sup>DD 1543-1555 – a peptide corresponding to the transient  $\alpha$ -helix in the complex structure - and KJ12B-<sup>C</sup>DD<sub>short</sub>. All three peptides show characteristics for a random coil or unstructured conformation in the CD spectrum with a strong negative peak at 200 nm.<sup>9</sup>

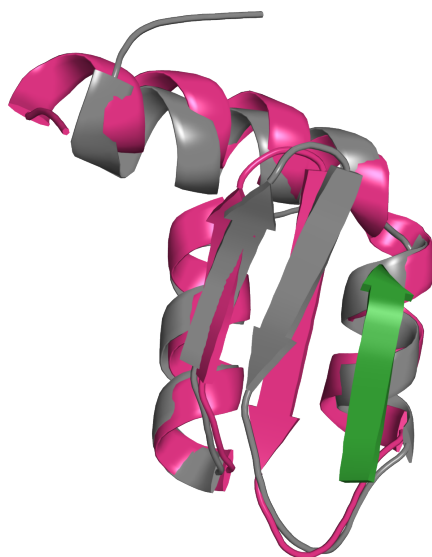

**Supplementary Figure 13. Structure overlay of Kj12C-<sup>N</sup>DD free and bound.** Overlay of the mean structures of Kj12C <sup>N</sup>DD alone in gray with the complex structure of Kj12C-<sup>N</sup>DD-12xGS-Kj12B-<sup>C</sup>DD (residues 1-63 in magenta and residues 1564-1568 in green, flexible residues are not shown). Residues 1-63 align with a C $\alpha$ -RMSD of 1.18 Å.

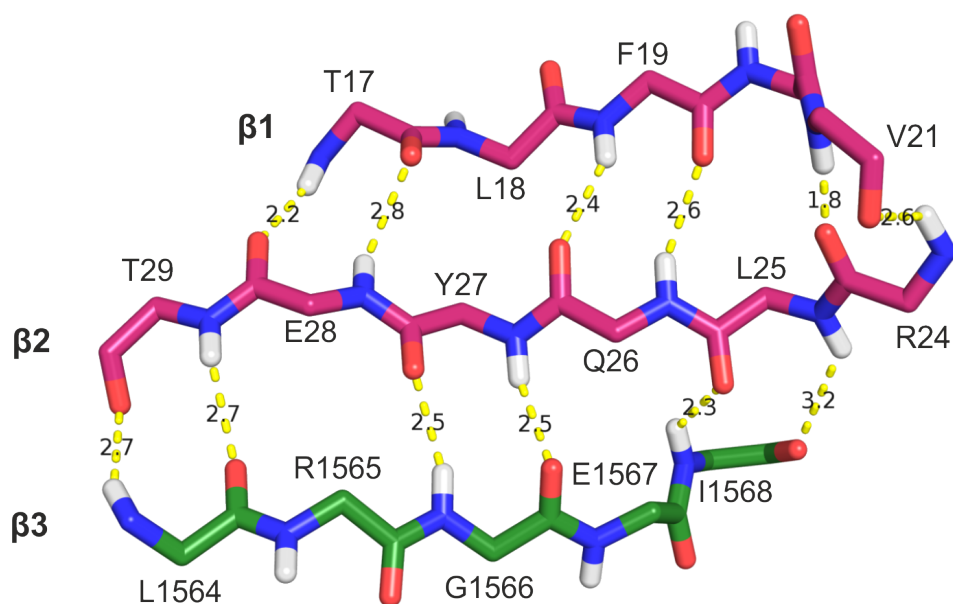

**Supplementary Figure 14. Hydrogen bonds in the <sup>N</sup>DD-<sup>C</sup>DD complex across the intermolecular  $\beta$ -sheet.** Detailed view of the <sup>N</sup>DD-<sup>C</sup>DD interaction of  $\beta$ -sheet 2 of Kj12C-<sup>N</sup>DD (magenta) with the last 5 amino acids of Kj12B-<sup>C</sup>DD (green), hydrogen bonds are shown in stick representation with the N-C distances given in Ångström.

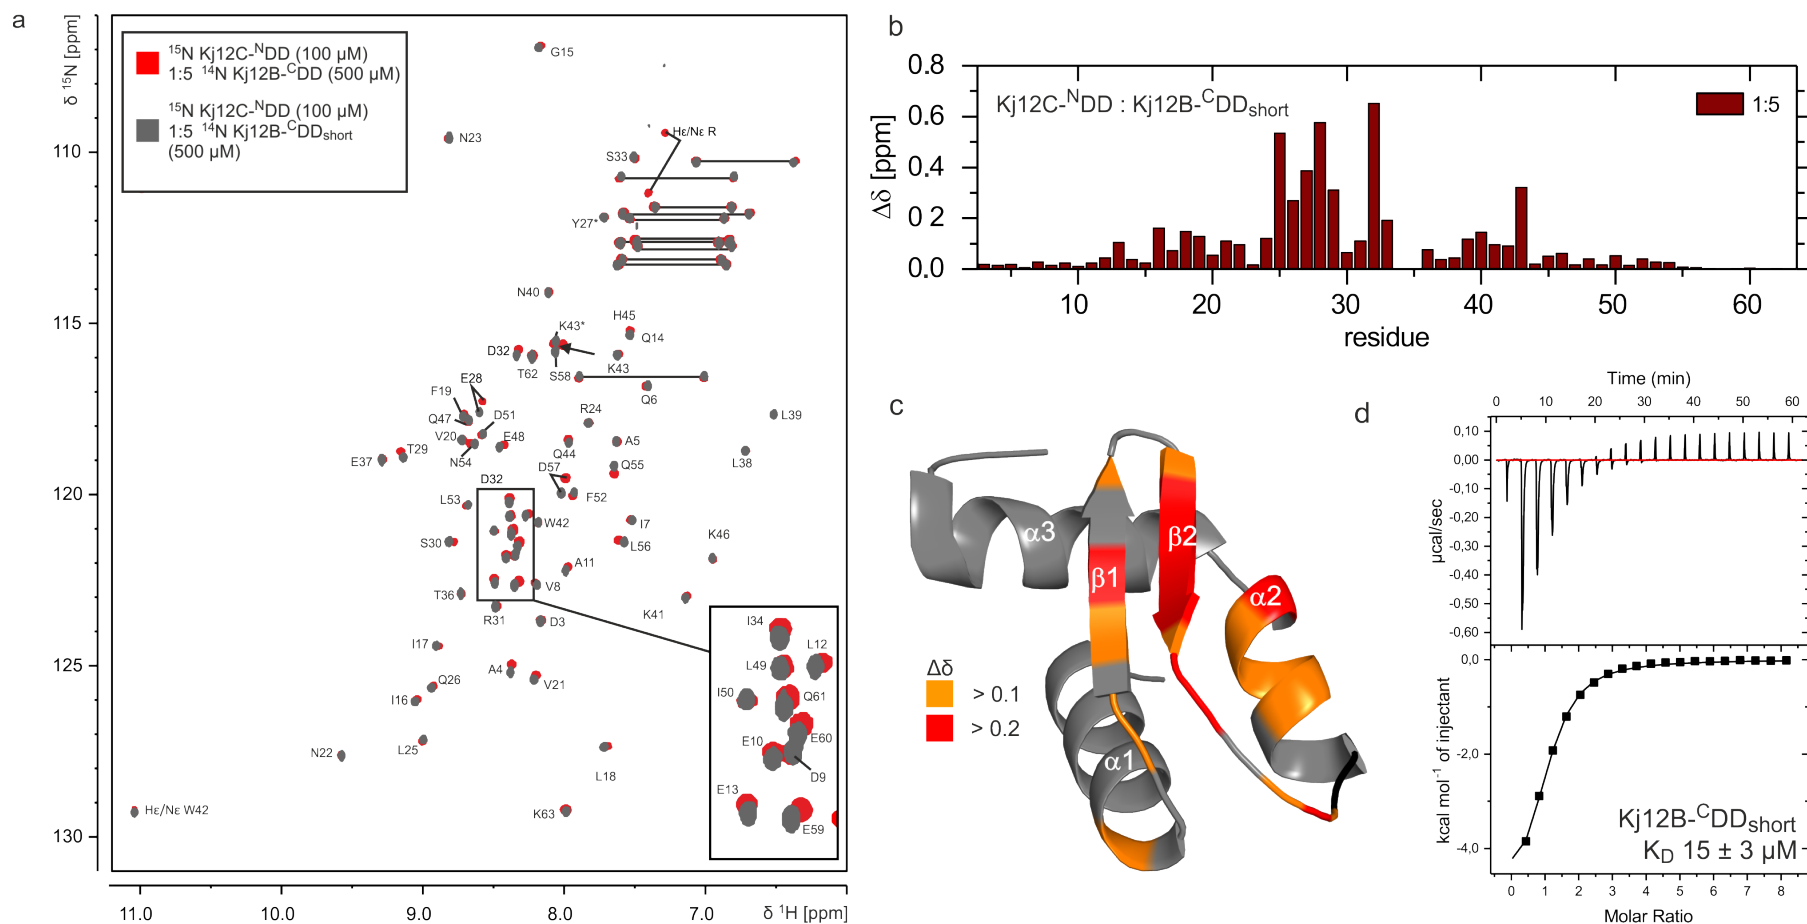

**Supplementary Figure 15. Titration with Kj12B- $^{\text{CDDshort}}$ .** **a**,  $^1\text{H}$ ,  $^{15}\text{N}$ -HSQC spectra for titrations of 100  $\mu\text{M}$   $^{15}\text{N}$  labeled Kj12C- $^{\text{NDD}}$  with a 5-fold excess of unlabeled Kj12B- $^{\text{CDD}}$  (red) and 100  $\mu\text{M}$   $^{15}\text{N}$  labeled Kj12C- $^{\text{NDD}}$  with a 5-fold excess of unlabeled Kj12B- $^{\text{CDDshort}}$  (gray). **b**, Histogram of the chemical shift differences of the  $^1\text{H}$ ,  $^{15}\text{N}$  HSQC spectra of the free N-terminal docking domain of Kj12C and bound to Kj12B- $^{\text{CDDshort}}$  (1:5 ratio, titration endpoint). **c**, Chemical shift changes upon addition of unlabeled Kj12B- $^{\text{CDDshort}}$  in 5-fold excess mapped onto the structure of the  $^{\text{NDD}}$ . **d**, ITC thermograms and the derived binding curves for titrations of Kj12C- $^{\text{NDD}}$  with Kj12B- $^{\text{CDDshort}}$ .

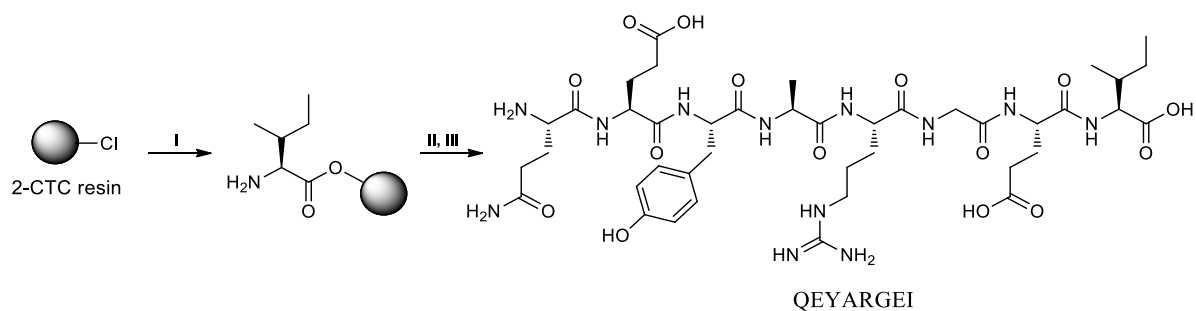

**Supplementary Figure 16. Representative solid phase synthesis of  $^{\text{C}}\text{DD}_{\text{short}}$  peptide derivatives exemplarily shown for QEYARGEI. I, Fmoc-Ile-OH, DIPEA, DCM, overnight, DCM/CH<sub>3</sub>OH/DIPEA (80:15:5), then piperidine/NMP. II, Fmoc-AA-OH, HCTU, DMF, DIPEA, NMP, 50 min, then piperidine/NMP. III, TFA/TIS/water (95:2.5:2.5), 3 h.**

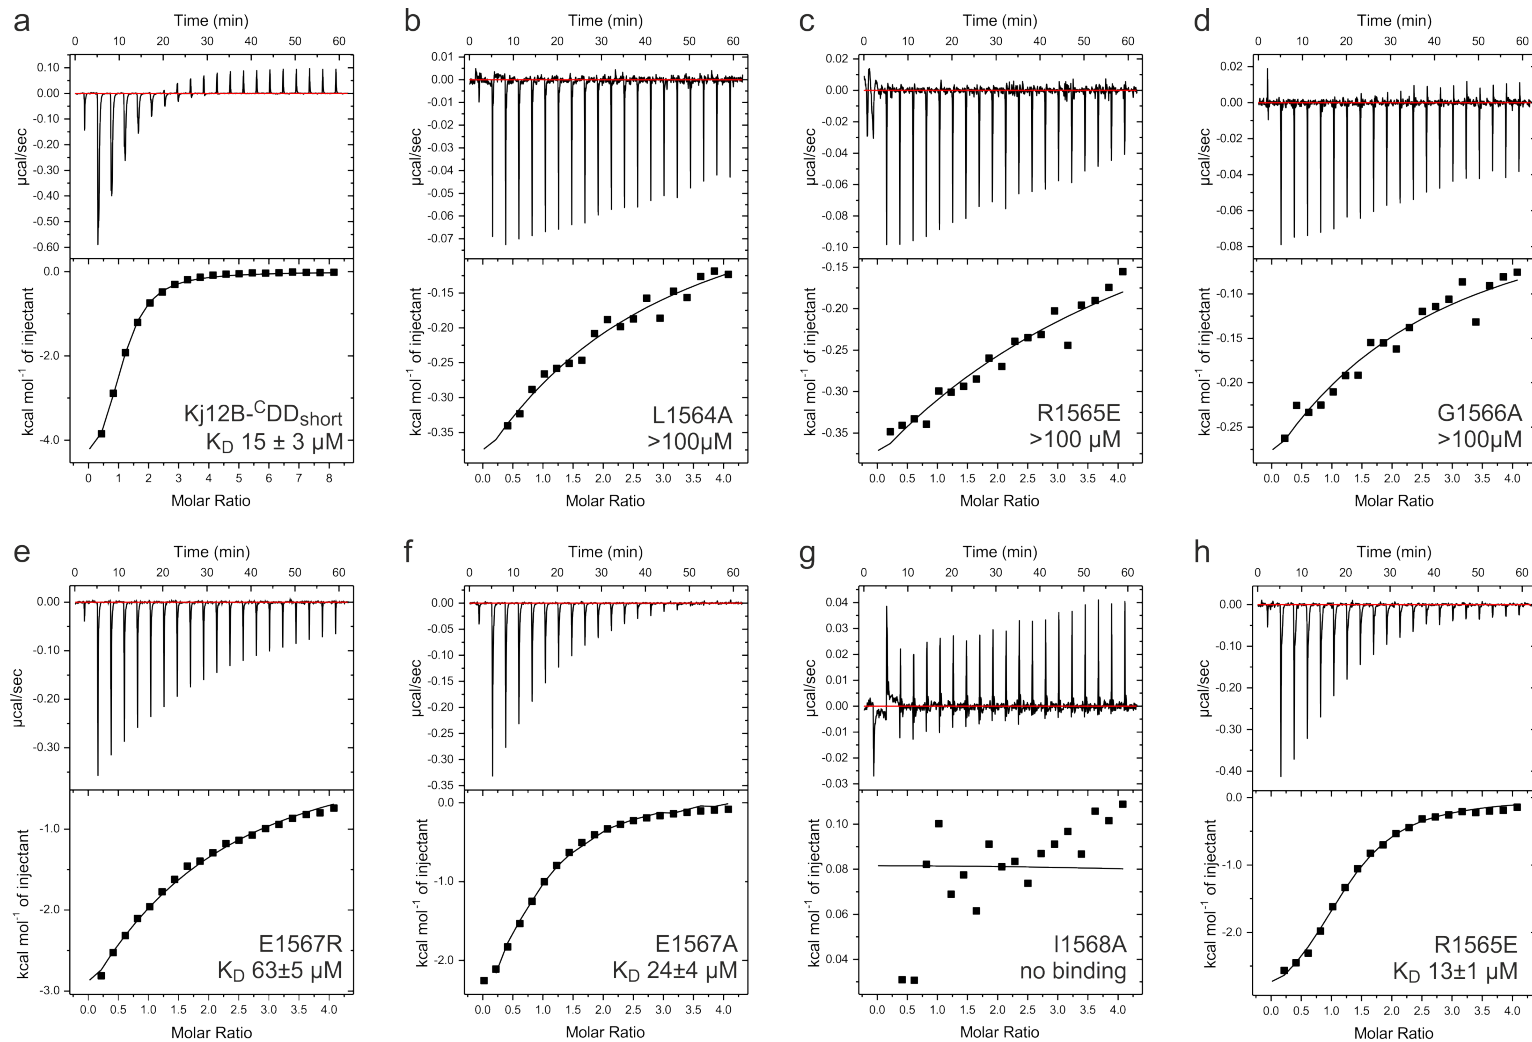

**Supplementary Figure 17. ITC titration with variants of K<sub>j</sub>12B<sup>C</sup>DD<sub>short</sub>.** **a**, Titration of K<sub>j</sub>12C<sup>N</sup>DD with the native K<sub>j</sub>12B<sup>C</sup>DD<sub>short</sub> peptide **b-g**, Titration of K<sub>j</sub>12C<sup>N</sup>DD with variants of the K<sub>j</sub>12B<sup>C</sup>DD<sub>short</sub> peptide (L1564A, R1465E, G1566A, E1567R, E1567A and I1568A). **h**, Titration of K<sub>j</sub>12B<sup>C</sup>DD<sub>short</sub> R1565E peptide.

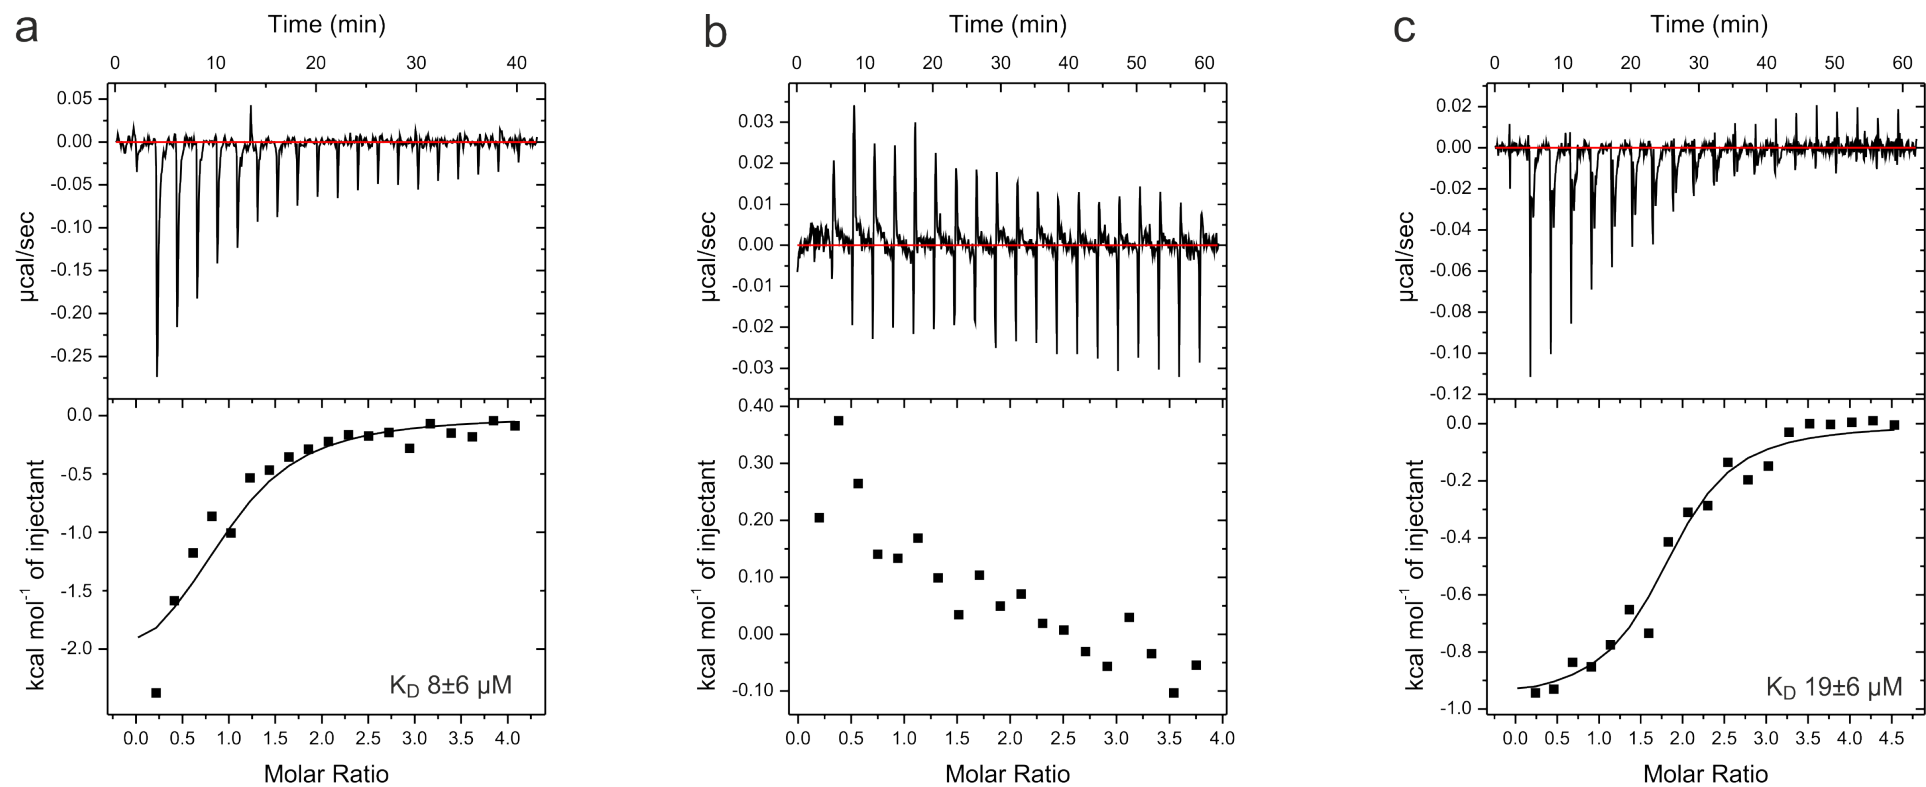

**Supplementary Figure 18. ITC titration of docking domains with adjacent domains** Titration of **a** K<sub>j</sub>12C<sup>NDD</sup>-C<sub>term</sub> and **b** K<sub>j</sub>12C-C<sub>term</sub> without the N-terminal docking domain with the K<sub>j</sub>12B<sup>CDD<sub>short</sub></sup> peptide. **c**, Titration of K<sub>j</sub>12B-T<sub>dom</sub>-C<sub>DD</sub> with the K<sub>j</sub>12C<sup>NDD</sup>.

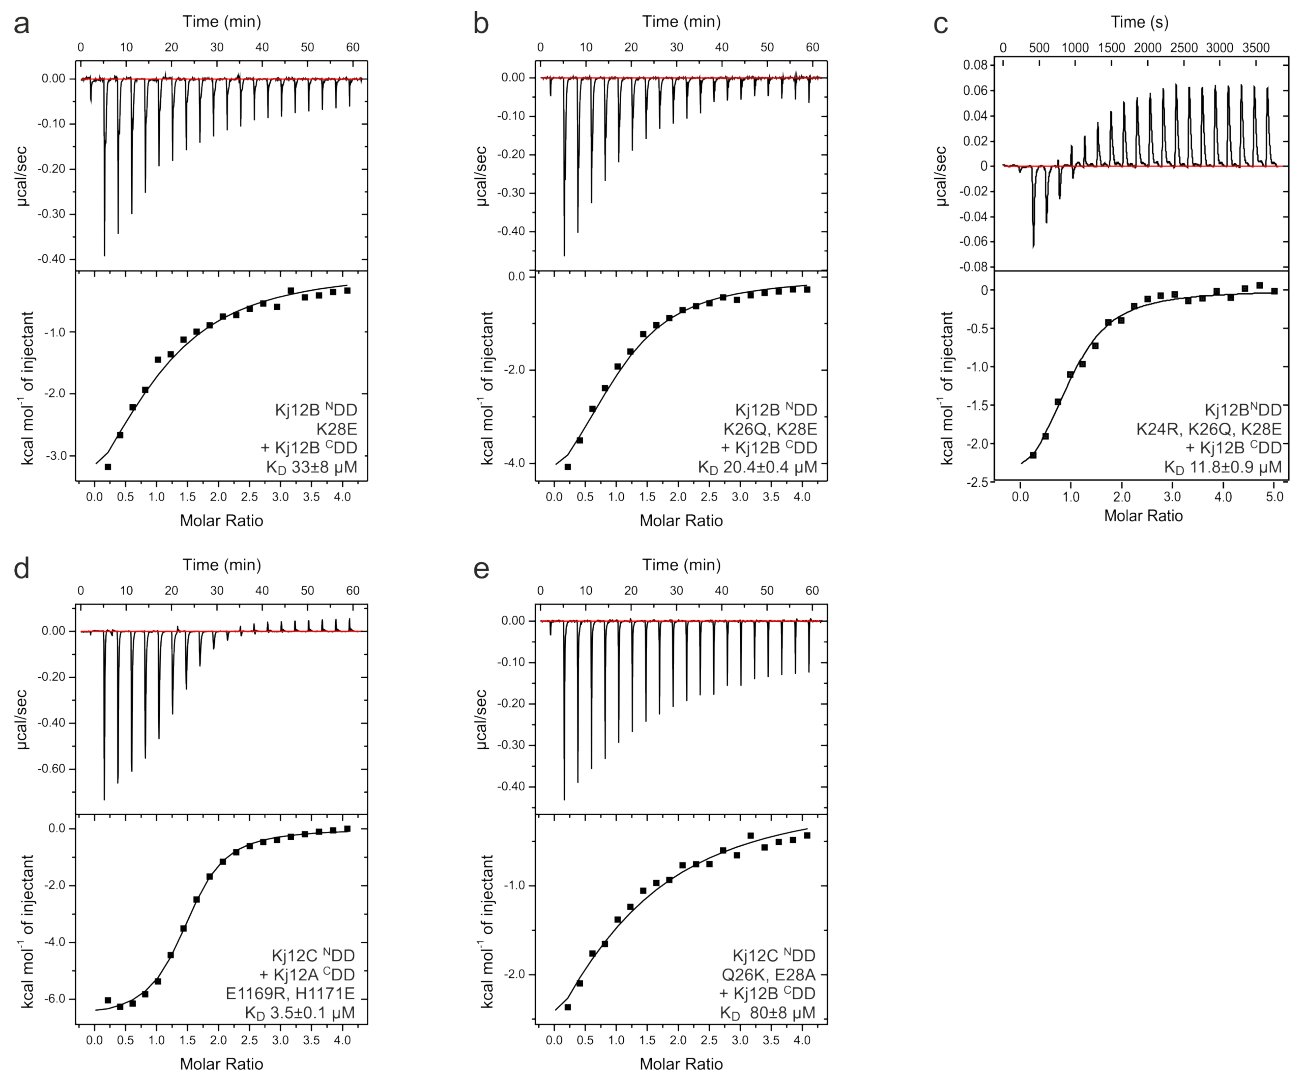

**Supplementary Figure 19. ITC titration with variants used by *in vivo* experiments.** Titration of K<sub>j</sub>12B<sup>N</sup>DD with different point mutations with the K<sub>j</sub>12B<sup>C</sup>DD<sub>short</sub> peptide. The single mutant of K<sub>j</sub>12B<sup>N</sup>DD (K28E) is shown in **a**, the double mutant (K26Q, K28E) in **b** and the triple mutant (K24R, K26Q, K28E) in **c**; **d** K<sub>j</sub>12C<sup>N</sup>DD titrated with optimized K<sub>j</sub>12A<sup>C</sup>DD<sub>short</sub> E1169R, H1171E; **e** K<sub>j</sub>12C<sup>N</sup>DD Q26K, E28A titrated with K<sub>j</sub>12B<sup>C</sup>DD<sub>short</sub>.

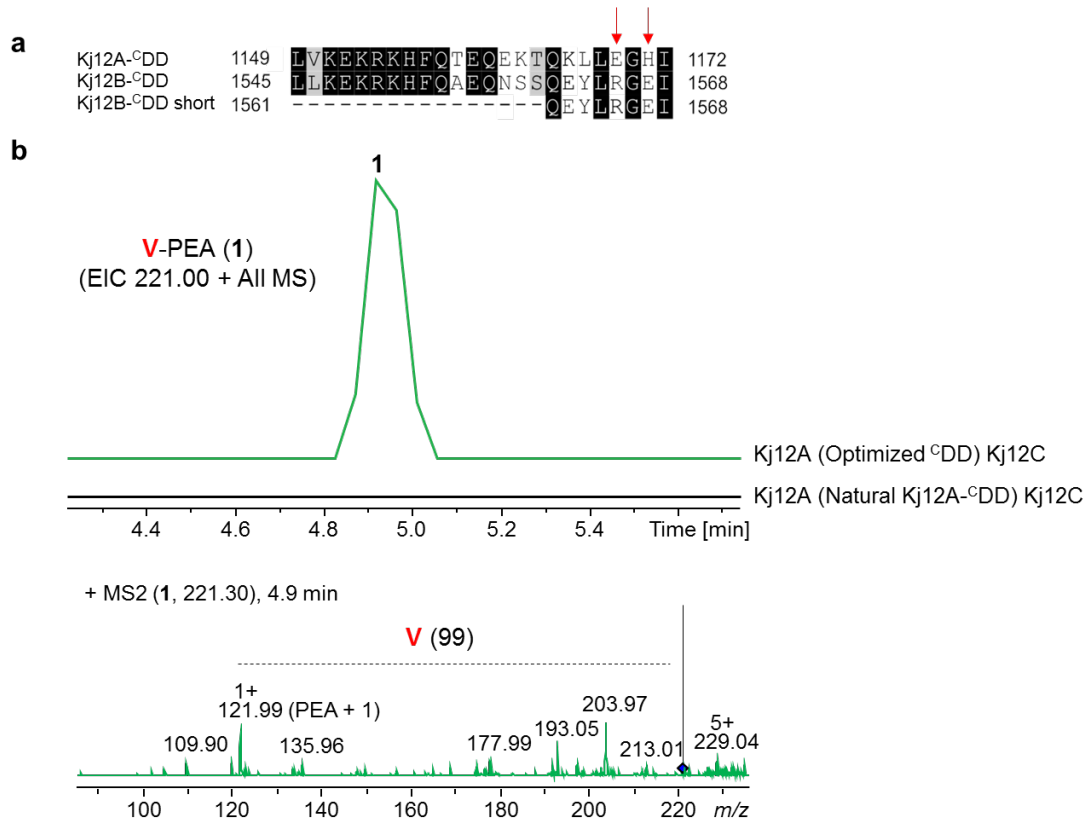

**Supplementary Figure 20. Optimization of Kj12A-<sup>c</sup>DD facilitated the interaction between Kj12A and Kj12C, leading to the production of V-PEA (1).** **a**, Sequence alignment of <sup>c</sup>DDs of Kj12A and Kj12B. The essential interactive motif of Kj12B-<sup>c</sup>DD was shown as Kj12B-<sup>c</sup>DD<sub>short</sub>. The key residues on the motif were indicated with red arrows. **b**, EIC of **1** produced in the coexpression system of modified Kj12A and natural Kj12C, relative to that in the natural Kj12A and Kj12C. MS/MS fragmentation of **1** is also shown.



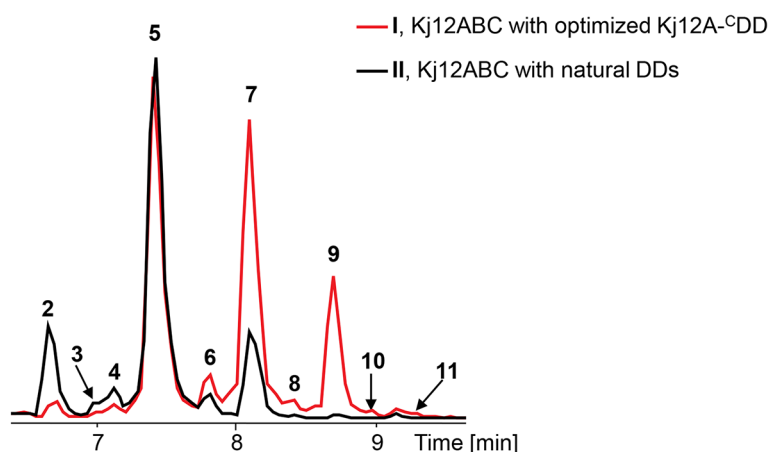

| Compound | Rt/min | m/z   | Structure               | Relative RXP amount |              |
|----------|--------|-------|-------------------------|---------------------|--------------|
|          |        |       |                         | I                   | II           |
| 2        | 6.7    | 447.3 | mV-V-mV-PEA             | 5.6 ± 0.3           | 20.7 ± 8.6   |
| 3        | 6.9    | 532.3 | V-V-mV-PEA              | 0.9 ± 0.5           | 0.5 ± 0.9    |
| 4        | 7.3    | 546.4 | mV-V-mV-V-PEA           | 8.4 ± 2.6           | 15.8 ± 15.8  |
| 5        | 7.4    | 560.3 | mV-V-mV-mV-PEA          | 100.0 ± 10.0        | 100.0 ± 10.0 |
| 6        | 7.8    | 574.4 | mV-mV-mV-mV-PEA         | 5.5 ± 0.7           | 5.1 ± 10.3   |
| 7        | 8.1    | 673.3 | mV-V-mV-mV-mV-PEA       | 93.3 ± 8.4          | 28.2 ± 16.1  |
| 8        | 8.4    | 687.3 | mV-mV-mV-mV-mV-PEA      | 7.2 ± 3.0           | 2.6 ± 2.8    |
| 9        | 8.7    | 786.3 | mV-V-mV-mV-mV-mV-PEA    | 44.1 ± 4.5          | 3.2 ± 4.3    |
| 10       | 9      | 800.4 | mV-mV-mV-mV-mV-mV-PEA   | 3.5 ± 0.6           | 0.5 ± 0.2    |
| 11       | 9.3    | 899.5 | mV-V-mV-mV-mV-mV-mV-PEA | 2.5 ± 0.8           | -            |

**Supplementary Figure 21. Comparison of RXPs produced in natural and optimized Kj12ABC systems via LC/MS analysis.** Base peak chromatograms (BPCs) from both systems were shown. Optimized Kj12ABC (I), red line; natural Kj12ABC (II), black line. The table shows the retention time (Rt), detected masses (*m/z*) in [M+H]<sup>+</sup>, structures (simplified codes) and relative production of all RXPs produced in both systems as determined from triplicate experiments.

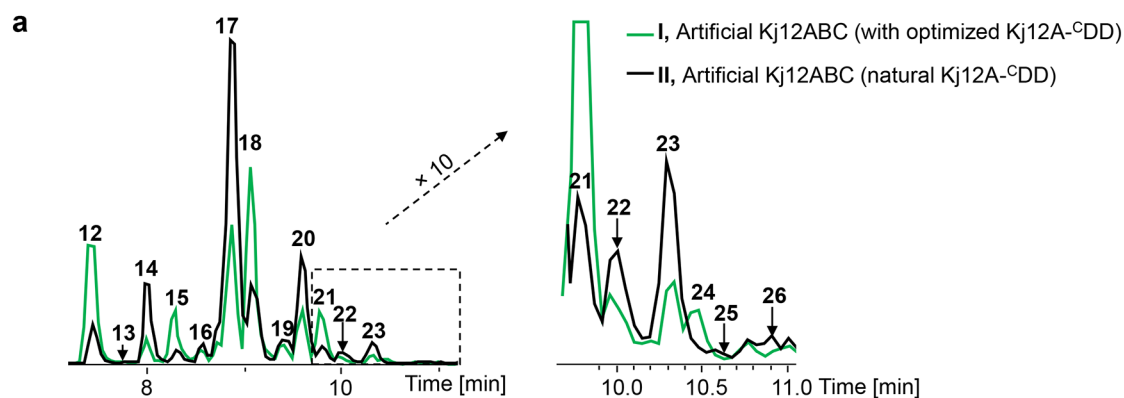

| Compound | Rt/min | m/z    | Structure                | Relative RXP amount |              |
|----------|--------|--------|--------------------------|---------------------|--------------|
|          |        |        |                          | I                   | II           |
| 12       | 7.5    | 475.5  | V-mL-mL-PEA              | 72.3 ± 9.1          | 10.0 ± 1.3   |
| 13       | 7.9    | 489.4  | mL-L-mL-PEA              | 1.31 ± 0.5          | 1.6 ± 2.7    |
| 14       | 8.0    | 503.4  | mL-mL-mL-PEA             | 10.8 ± 4.2          | 20.3 ± 2.4   |
| 15       | 8.3    | 602.4  | V-mL-mL-mL-PEA           | 29.4 ± 4.5          | 4.6 ± 1.3    |
| 16       | 8.7    | 616.5  | mL-L-mL-mL-PEA           | 10.1 ± 2.2          | 12.9 ± 11.6  |
| 17       | 8.8    | 630.1  | mL-mL-mL-mL-PEA          | 62.7 ± 15.2         | 100.0 ± 10.0 |
| 18       | 9.1    | 729.1  | V-mL-mL-mL-mL-PEA        | 100.0 ± 10.0        | 25.6 ± 2.5   |
| 19       | 9.4    | 743.5  | mL-L-mL-mL-mL-PEA        | 12.5 ± 2.2          | 11.3 ± 3.2   |
| 20       | 9.6    | 757.5  | mL-mL-mL-mL-mL-PEA       | 21.2 ± 5.7          | 32.0 ± 3.8   |
| 21       | 9.8    | 856.6  | V-mL-mL-mL-mL-mL-PEA     | 20.5 ± 6.5          | 6.0 ± 0.6    |
| 22       | 10.2   | 870.4  | mL-L-mL-mL-mL-mL-PEA     | 2.6 ± 0.8           | 1.9 ± 0.7    |
| 23       | 10.3   | 884.7  | mL-mL-mL-mL-mL-mL-PEA    | 3.3 ± 1.4           | 6.6 ± 0.7    |
| 24       | 10.5   | 983.7  | V-mL-mL-mL-mL-mL-mL-PEA  | 2.6 ± 0.9           | 0.9 ± 0.1    |
| 25       | 10.7   | 997.7  | mL-L-mL-mL-mL-mL-mL-PEA  | 0.08 ± 0.02         | 0.1 ± 0.1    |
| 26       | 11.0   | 1011.6 | mL-mL-mL-mL-mL-mL-mL-PEA | 0.3 ± 0.08          | 0.5 ± 0.2    |

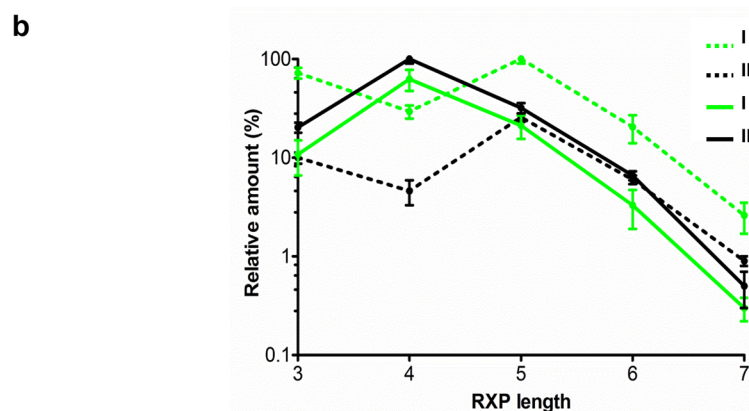

**Supplementary Figure 22. Comparison of RXPs produced in artificial K12ABC.** (Val specific A-MT from K12B was replaced against that from VietB for Leu specificity) with natural K12A-CDD (black, II) and optimized K12A-CDD (green, I) analyzed by HPLC/MS. **a**, BPCs from both systems were shown. The table shows the retention time (Rt), detected masses (*m/z*) in [M+H]<sup>+</sup>, structures (simplified codes: Val, V; Leu, L; *N*-methylated Leu, mL) and relative production of all RXPs produced in both systems as determined from triplicate experiments. **b**, The diagram shows the relative amounts (%) and peptide length (in numbers of amino acids) of fully methylated RXPs (solid line) and RXPs containing one Val (dash line) produced in both systems.

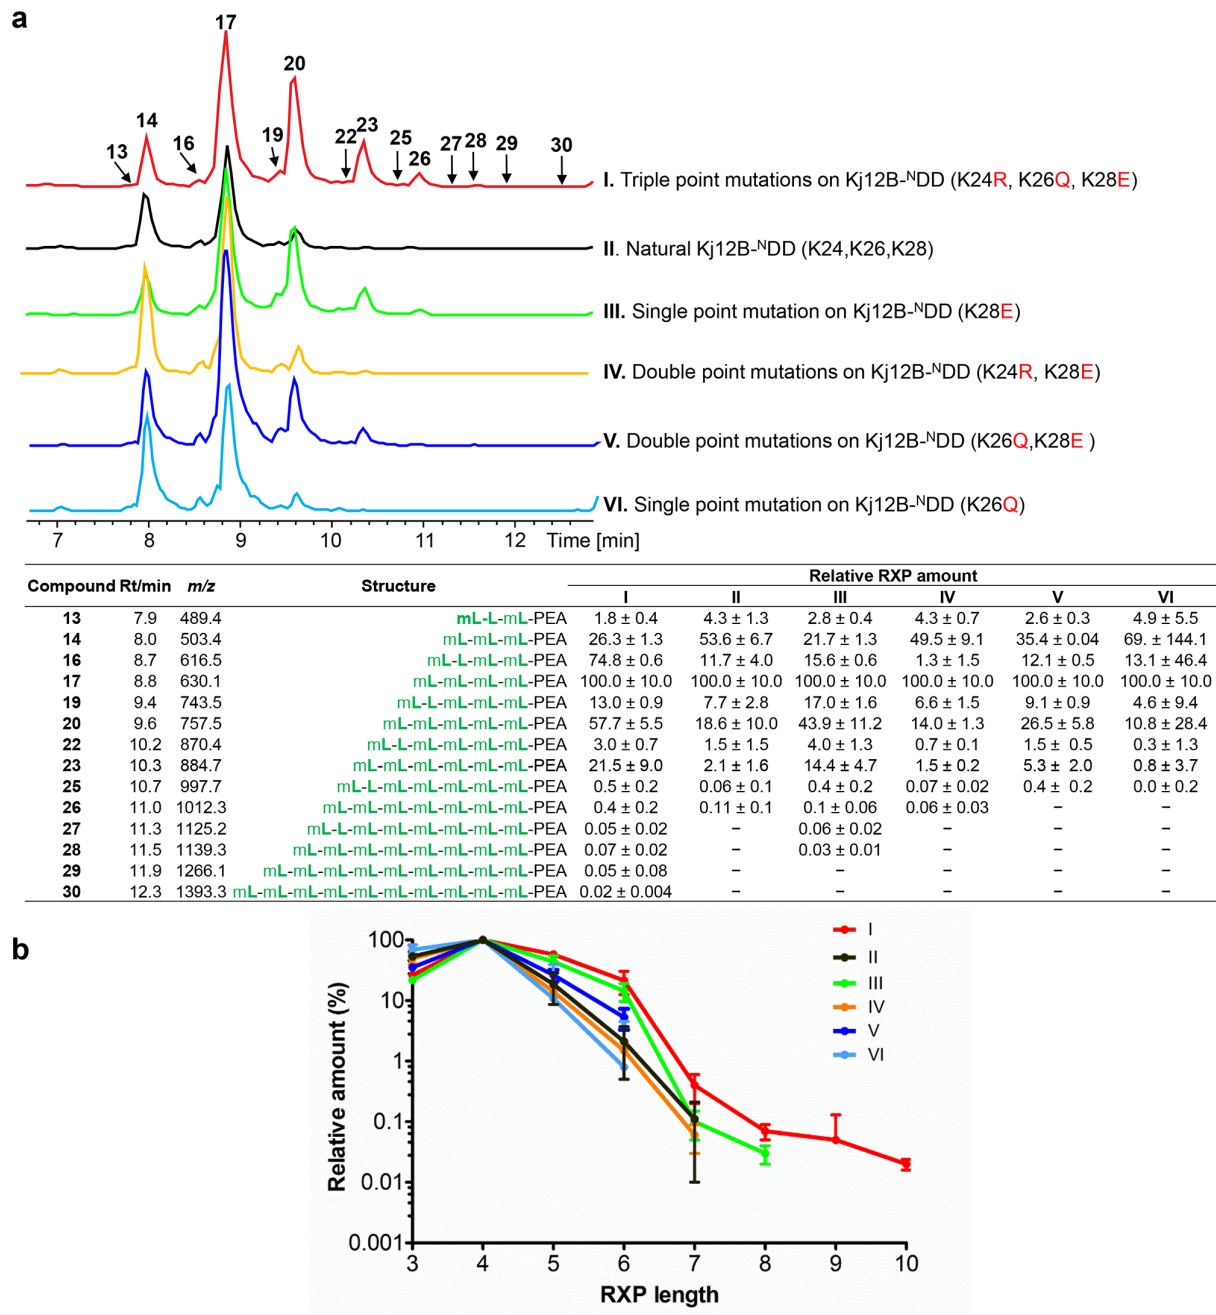

**Supplementary Figure 23. Comparison of RXPs produced in artificial K<sub>j</sub>12BC.** (Val specific A-MT from K<sub>j</sub>12B was replaced against that from VietB for Leu specificity) with natural K<sub>j</sub>12B-<sup>N</sup>DD (black, II) and optimized K<sub>j</sub>12B-<sup>N</sup>DDs: (K24R, K26Q, K28E) (red, I); (K28E) (green, III); (K24R, K28E) (yellow, IV); (K26R, K28E) (sapphire, V); and (K26Q) (light blue, VI) via LC/MS analysis. **a**, BPCs from all systems were shown. The table shows the retention time (Rt), detected masses (*m/z*) in [M+H]<sup>+</sup>, structures (simplified codes, Leu, L; *N*-methylated Leu, mL) and relative production of all RXPs produced in both systems. **b**, The diagram shows the relative amounts (%) and peptide length (in numbers of amino acids) of fully methylated RXPs (solid line) produced in all systems.

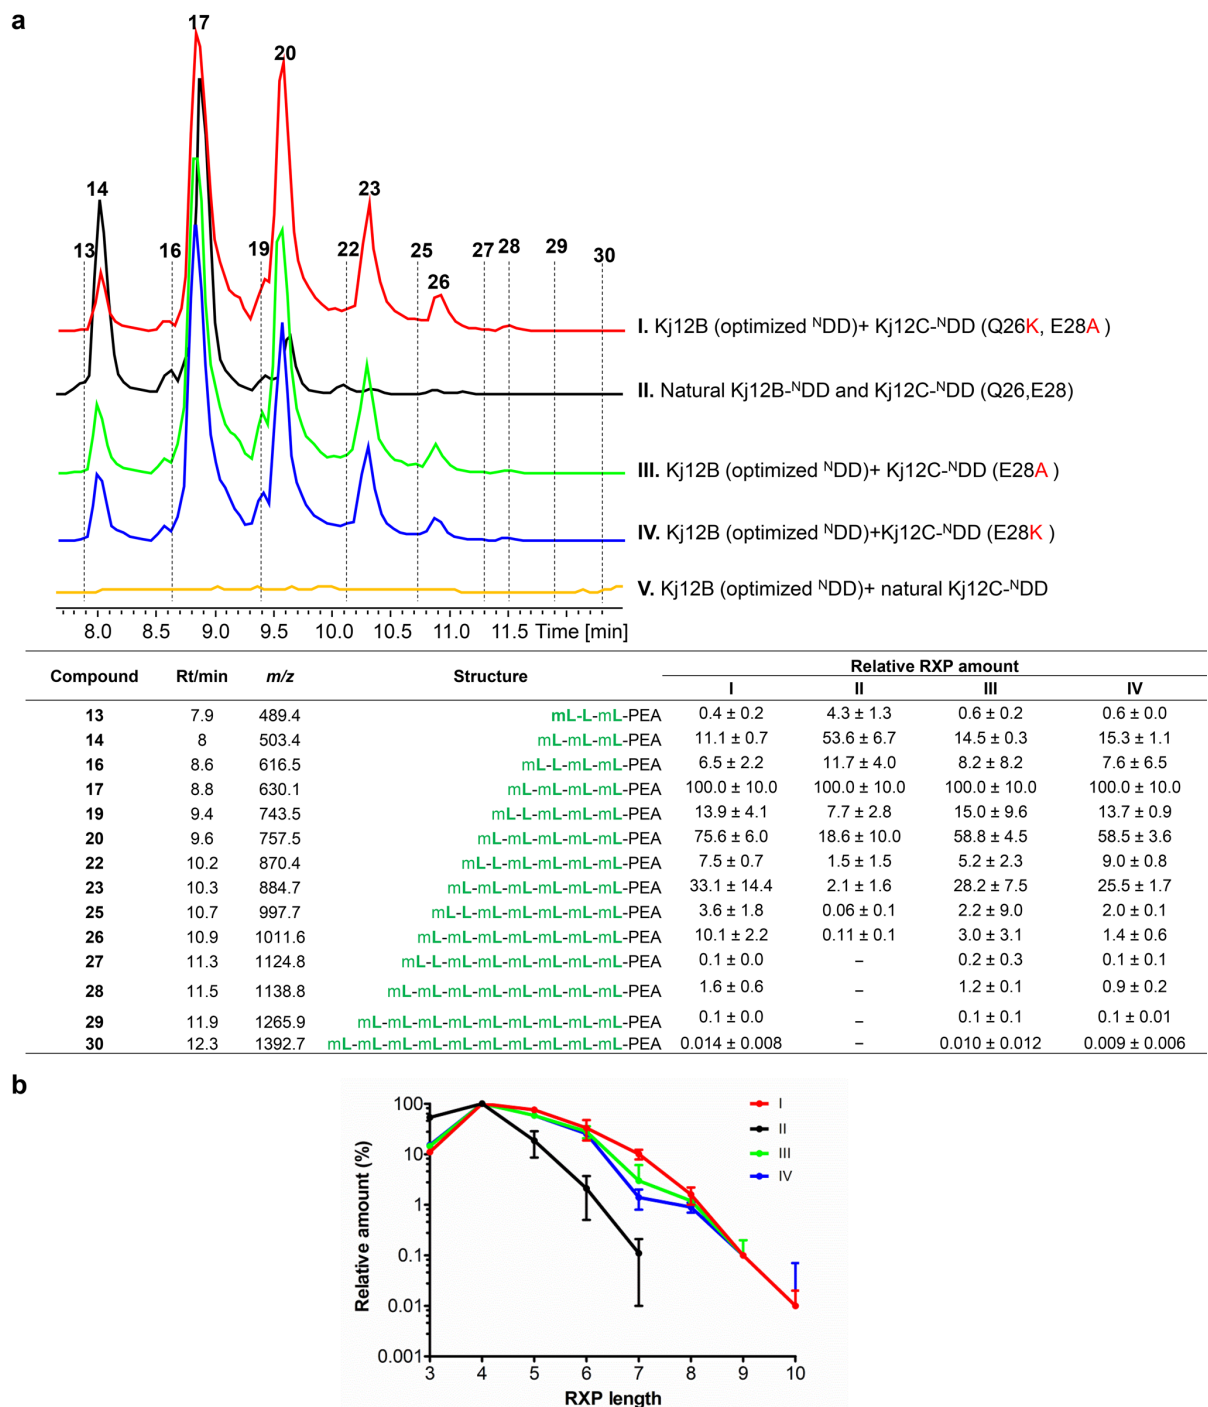

**Supplementary Figure 24. Comparison of RXPs produced in artificial Kj12BC.** **a**, Val specific A-MT from Kj12B was replaced against that from VietB for Leu specificity) with natural Kj12B-<sup>N</sup>DD and Kj12C-<sup>N</sup>DD (black, II) or optimized Kj12B-<sup>N</sup>DD (K24R, K26Q, K28E) and Kj12C-<sup>N</sup>DD in different modifications: (Q26K, E28A) (red, I); (E28A) (green, III); (E28K) (sapphire, IV) as well as optimized Kj12B-<sup>N</sup>DD coexpressed with natural Kj12C-<sup>N</sup>DD (yellow, V). The table shows the retention time (Rt), detected masses (*m/z*) in [M+H]<sup>+</sup>, structures (simplified codes, Leu, L; *N*-methylated Leu, mL) and relative production of all RXPs produced in both systems. **b**, The diagram shows the relative amounts (%) and peptide length (in numbers of amino acid composition) of fully methylated RXPs (solid line) produced in all systems.

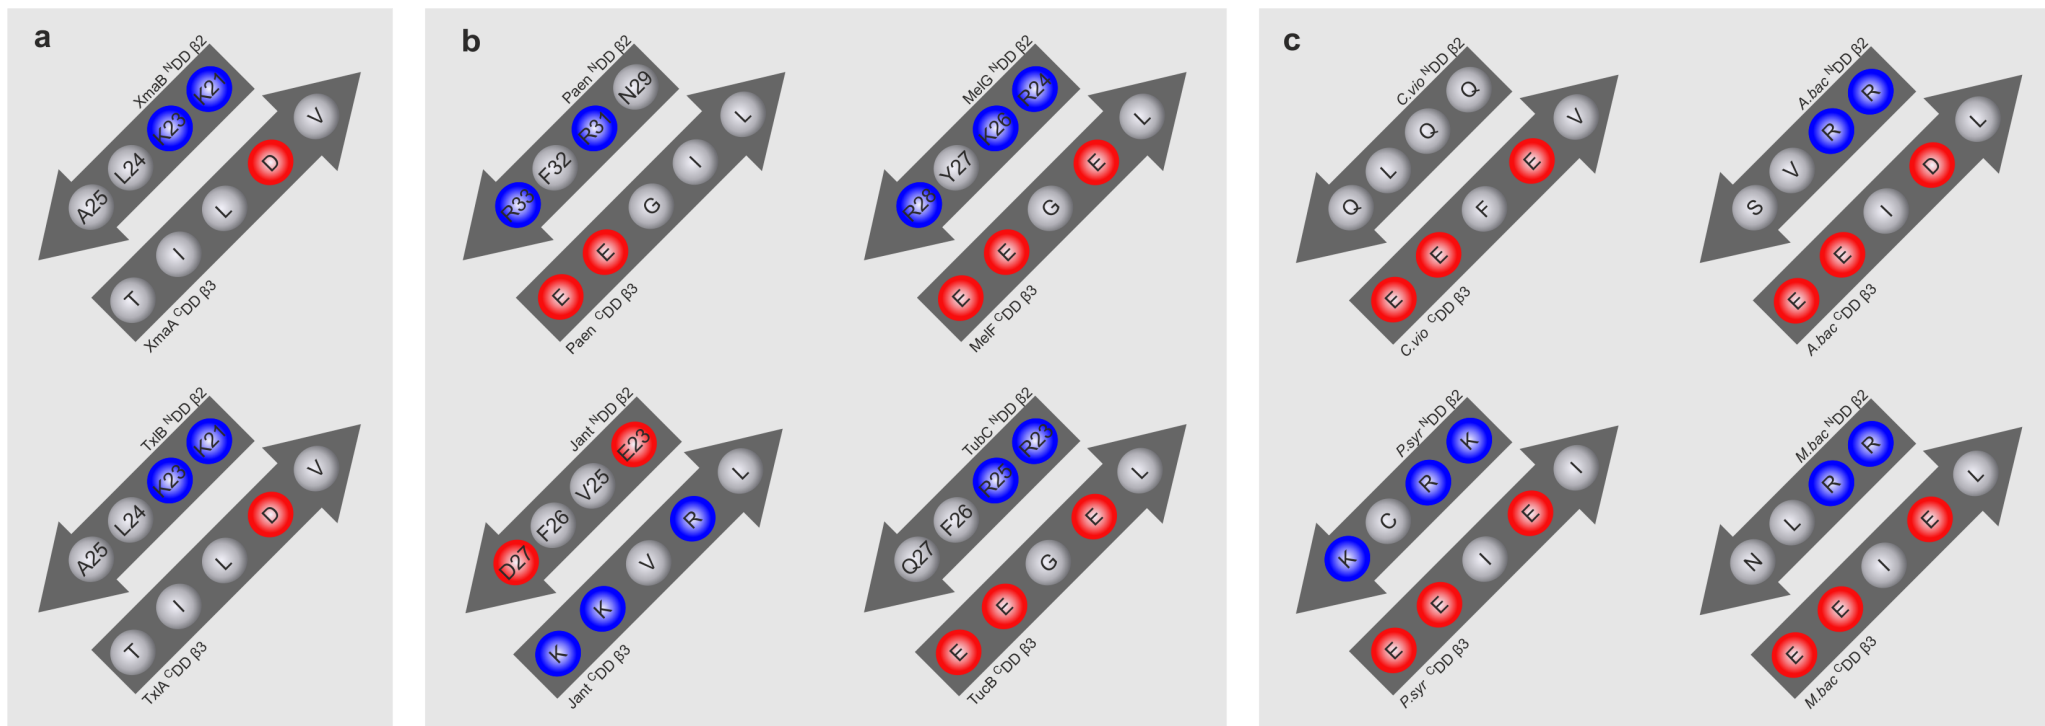

**Supplementary Figure 25. Schematic representation of  $\beta$ -sheets with key residues mediating DD interaction in docking domains of the same structural class as Kj12BC.** **a**, Two examples are shown from Supplementary Figure 2b, the interaction of this group is always based on a salt bridge between a positive residue on the <sup>N</sup>DD and a negative residue on the <sup>C</sup>DD and a hydrophobic interaction. **b**, Four examples are shown from Supplementary Figure 2c; this group of DD contains different types of key residues combinations; Paen<sup>NDD</sup>-<sup>CDD</sup> interaction consists of a hydrophobic interaction and salt bridge between R33 of the <sup>N</sup>DD and two negative residues on the <sup>C</sup>DD, the Jant<sup>NDD</sup>-<sup>CDD</sup> interaction consists of two salt bridges with negative residues on the <sup>N</sup>DD and positive residues on the <sup>C</sup>DD, MeIG-<sup>NDD</sup> MeIF-<sup>CDD</sup> interaction also consists of two salt bridges with positive residues on the <sup>N</sup>DD and negative residues on the <sup>C</sup>DD. In the case of TubC<sup>NDD</sup>-TubB<sup>CDD</sup> interaction, a salt bridge is replaced by a hydrogen bond between a Q and an E. Positive residues are shown as blue circles, negative residues as red circles and hydrophobic residues as white circles. **c**, *C.vio*: *Chromobacterium violaceum* strain 968, *P.syr*: *Pseudomonas syringae* pv. *syringae* B728a, *A.bac*: *Acidobacteria bacterium* SCN 69-37, *M.bac*: *Mycolicibacterium bacteremicum*.

## Supplementary Tables

**Supplementary Table 1.** Structural statistics for the NMR solution structures of Kj12A-<sup>N</sup>DD, Kj12B-<sup>N</sup>DD, Kj12C-<sup>N</sup>DD and Kj12C-<sup>N</sup>DD-Kj12B-<sup>C</sup>DD.

|                                                        | Kj12A- <sup>N</sup> DD | Kj12B- <sup>N</sup> DD | Kj12C- <sup>N</sup> DD | Kj12C- <sup>N</sup> DD-<br>Kj12B- <sup>C</sup> DD |
|--------------------------------------------------------|------------------------|------------------------|------------------------|---------------------------------------------------|
| <b>Conformational restricting restraints</b>           |                        |                        |                        |                                                   |
| Total NOE distance restraints                          | 1577                   | 1783                   | 1559                   | 2370                                              |
| intraresidue  i = j                                    | 343                    | 373                    | 352                    | 466                                               |
| sequential  i - j  = 1                                 | 403                    | 443                    | 382                    | 616                                               |
| medium-range 1 <  i - j  < 5                           | 498                    | 486                    | 391                    | 653                                               |
| long-range  i - j  ≥ 5                                 | 333                    | 481                    | 434                    | 635                                               |
| Dihedral angle restraints (Talos+)                     | 102                    | 96                     | 106                    | 140                                               |
| No. of restraint per residue                           | 27.1                   | 30.3                   | 25.7                   | 25.8                                              |
| No. of long-range restraints per residue               | 5.4                    | 7.8                    | 6.8                    | 6.9                                               |
| <b>Residual restraint violations<sup>a</sup></b>       |                        |                        |                        |                                                   |
| Average no. of distance violations per structure       |                        |                        |                        |                                                   |
| 0.1-0.2 Å                                              | 4.5                    | 4.35                   | 2.35                   | 9.95                                              |
| 0.2-0.5 Å                                              | 0.15                   | 0.3                    | 0.2                    | 0.8                                               |
| >0.5 Å                                                 | 0                      | 0                      | 0                      | 0.25                                              |
| Average no. of dihedral angle violations per structure |                        |                        |                        |                                                   |
| 1-10°                                                  | 13.5                   | 3.75                   | 7.55                   | 15.2                                              |
| >10°                                                   | 0                      | 0                      | 0                      | 2.4                                               |
| <b>Model quality (ordered residues)<sup>a</sup></b>    |                        |                        |                        |                                                   |
| RMSD backbone atoms (Å)                                | 0.1                    | 0.2                    | 0.1                    | 0.2                                               |
| RMSD heavy atoms (Å)                                   | 0.5                    | 0.6                    | 0.5                    | 0.5                                               |
| RMSD bond lengths (Å)                                  | 0.001                  | 0.001                  | 0.001                  | 0.001                                             |
| RMSD bond angles (°)                                   | 0.2                    | 0.2                    | 0.2                    | 0.2                                               |
| <b>MolProbity Ramachandran statistics<sup>a</sup></b>  |                        |                        |                        |                                                   |
| Most favored regions                                   | 97.3 %                 | 96.7 %                 | 92.5 %                 | 93.2 %                                            |
| Allowed regions                                        | 2.7 %                  | 3.3 %                  | 7.5 %                  | 5.1 %                                             |
| Disallowed regions                                     | 0 %                    | 0.0 %                  | 0.1 %                  | 1.7 %                                             |
| <b>Global quality scores (raw/Z score)<sup>a</sup></b> |                        |                        |                        |                                                   |
| Verify3D                                               | 0.38/-1.28             | 0.41/-0.8              | 0.33/-2.09             | 0.31/-2.41                                        |
| ProsaII                                                | 0.94/1.20              | 1.09/1.82              | 1.03/1.57              |                                                   |
| PROCHECK (φ-ψ)                                         | 0.07/-0.58             | 0.04/0.47              | -0.17/-0.35            | -0.09/-0.04                                       |
| PROCHECK (all)                                         | -0.55/-3.25            | -0.53/-3.13            | -0.55/-3.25            | -0.54/-3.19                                       |
| MolProbity clash score                                 | 30.80/-3.76            | 27.64/-3.22            | 29.68/-3.57            | 13.64/-0.82                                       |
| <b>Model contents</b>                                  |                        |                        |                        |                                                   |
| Ordered residue ranges (HetNOE > 0.6)                  | 2-58                   | 3-58                   | 3-57                   | 3-58,1564-1568                                    |
| Total no. of residues                                  | 63                     | 62                     | 63                     | 99                                                |
| BMRB accession number                                  |                        |                        |                        |                                                   |
| PDB ID code                                            | 6EWS                   | 6EWT                   | 6EWU                   | 6EWV                                              |

<sup>a</sup> calculated using PSVS 1.5 for using ordered residues (HetNOE > 0.6) (Bhattacharya et al., 2007). Average distance violations were calculated using the sum over r-6.

**Supplementary Table 2.** ITC titration experiments of all RXP<sup>N</sup>DDs with CDDs.

|                                         |                                                           | K <sub>D</sub><br>[μM]                  | N<br>[sites] | ΔH<br>[kcal/mol] | ΔS<br>[cal/mol/deg] | c-values |           |
|-----------------------------------------|-----------------------------------------------------------|-----------------------------------------|--------------|------------------|---------------------|----------|-----------|
| Kj12A- <sup>N</sup> DD                  | Kj12A- <sup>C</sup> DD                                    | weak                                    |              |                  |                     |          |           |
|                                         | Kj12B- <sup>C</sup> DD                                    | 8±4                                     | 0.81±0.01    | -4±2             | 9±7                 | 12±6     |           |
| Kj12B- <sup>N</sup> DD                  | Kj12A- <sup>C</sup> DD                                    | weak                                    |              |                  |                     |          |           |
|                                         | Kj12B- <sup>C</sup> DD                                    | 62±8                                    | 1±0          | -5.4±0.6         | 0.8±1.8             | 1.6±0.2  |           |
|                                         | Kj12B- <sup>C</sup> DD <sub>short</sub><br>R1565E         | 13±2                                    | 1.15±0.08    | 3.31±0.06        | 11.2±0.5            | 9.1±0.6  |           |
| Kj12B- <sup>N</sup> DD                  | K28E                                                      | Kj12B- <sup>C</sup> DD <sub>short</sub> | 33±8         | 1±0              | -5±5                | 3±2      | 3.1±0.7   |
|                                         | K26Q, K28E                                                | Kj12B- <sup>C</sup> DD <sub>short</sub> | 20.4±0.4     | 1±0              | -6±3                | 2±2      | 4.89±0.09 |
|                                         | K24R, K26Q,<br>K28E                                       | Kj12B- <sup>C</sup> DD <sub>short</sub> | 11.8±0.9     | 0.97±0.02        | -2.8±0.1            | 12.7±0.1 | 8.2±0.8   |
| Kj12C- <sup>N</sup> DD                  | Kj12A- <sup>C</sup> DD                                    | weak                                    |              |                  |                     |          |           |
|                                         | Kj12A- <sup>C</sup> DD <sub>short</sub><br>E1169R, H1171E | 3.5±0.1                                 | 1.3±0.2      | -6.3±0.9         | 1.7±0.5             | 38±4     |           |
|                                         | Kj12B- <sup>C</sup> DD                                    | 8±6                                     | 0.90±0.12    | -5.0±3.0         | 6±13                | 15±12    |           |
|                                         | Kj12B- <sup>C</sup> DD <sub>short</sub>                   | 15±3                                    | 1.05±0.11    | -5.3±0.1         | 3.9±0.2             | 7.2±0.5  |           |
|                                         | L1564A                                                    | weak                                    |              |                  |                     |          |           |
| Kj12B- <sup>C</sup> DD <sub>short</sub> | R1565E                                                    | weak                                    |              |                  |                     |          |           |
|                                         | G1566A                                                    | weak                                    |              |                  |                     |          |           |
|                                         | E1567R                                                    | 64±7                                    | 1.08±0.05    | -4.5±0.2         | 3.8±0.9             | 1.7±0.1  |           |
|                                         | E1567A                                                    | 24±6                                    | 0.90±0.15    | -18±2            | 11±1                | 3.9±0.3  |           |
| I1568A                                  | very weak                                                 |                                         |              |                  |                     |          |           |
| Kj12C-NDD Q26K,<br>E28A                 | Kj12B- <sup>C</sup> DD <sub>short</sub>                   | 80±8                                    | 1±0          | -6.3±0.3         | 3±1                 | 1.3±0.1  |           |
| Kj12C- <sup>N</sup> DD-Cterm            | Kj12B- <sup>C</sup> DD <sub>short</sub>                   | 8±6                                     | 1±0          | -1±1             | 19±7                | 16±12    |           |
| Kj12C-Cterm                             | Kj12B- <sup>C</sup> DD <sub>short</sub>                   | very weak                               |              |                  |                     |          |           |
| Kj12B-Tdom- <sup>C</sup> DD             | Kj12C- <sup>N</sup> DD                                    | 19±6                                    | 1.2±0.7      | -2±1             | 17±3                | 6±2      |           |



**Supplementary Table 3.** Identified RXP-like DD pairs in other bacteria. In the  $\beta$ -sheets that mediate the DD interaction acidic and basic amino acids are shown in red and blue, respectively.

|                                                        | GenBank accession No | <sup>C</sup> DD   | <sup>N</sup> DD   | <sup>C</sup> DD final $\beta$ -sheet* | <sup>N</sup> DD $\beta$ -sheet* | <sup>C</sup> DD              | <sup>N</sup> DD                |
|--------------------------------------------------------|----------------------|-------------------|-------------------|---------------------------------------|---------------------------------|------------------------------|--------------------------------|
| <i>Chromobacterium violaceum</i> strain 968            | EF210776.1           | ABP57747.1 (DepC) | ABP57748.1 (DepD) | EEITL                                 | QLQVQ                           | PKS-ACP- <sup>C</sup> DD     | <sup>N</sup> DD-C-NRPS         |
| <i>Pseudomonas</i> sp. 250J                            | GCA_001259595.1      | WP_050705533.1    | WP_050705534.1    | EEFEV                                 | KLRCK                           | T-OxRed- <sup>C</sup> DD     | <sup>N</sup> DD-C-NRPS         |
| <i>Pseudomonas fluorescens</i>                         | GCA_000012445.1      | WP_011333692.1    | WP_011333693.1    | EEFEV                                 | RLRCK                           | T-OxRed- <sup>C</sup> DD     | <sup>N</sup> DD-C-NRPS         |
| <i>Pseudomonas moraviensis</i> R28-S                   | GCA_000512275.1      | WP_065617345.1    | WP_065617344.1    | EEFEV                                 | RLRCK                           | T-OxRed- <sup>C</sup> DD     | <sup>N</sup> DD-C-NRPS         |
| <i>Pseudomonas syringae</i> pv. <i>syringae</i> B728a  | GCA_000012245.1      | WP_011267241.1    | WP_011267242.1    | EEIEI                                 | KLRCK                           | T-OxRed- <sup>C</sup> DD     | <sup>N</sup> DD-C-NRPS         |
| <i>Pseudomonas coronafaciens</i> pv. <i>garcae</i>     | LJQK0100091.1        | WP_055004516.1    | WP_055004515.1    | EEIEI                                 | KLRCK                           | T-OxRed- <sup>C</sup> DD     | <sup>N</sup> DD-C-NRPS         |
| <i>Chondromyces crocatus</i> Cm c5                     | GCA_001189295.1      | WP_082362833.1    | WP_050433124.1    | EEGEI                                 | KLRFQ                           | PKS-ACP- <sup>C</sup> DD     | <sup>N</sup> DD-C-NRPS-PKS     |
| <i>Angiococcus disciformis</i>                         | AJ620477.1           | CAF05648.1        | CAF05649.1        | EEGEL                                 | RLRFQ                           | NRPS-T- <sup>C</sup> DD      | <sup>N</sup> DD-C-NRPS         |
| <i>Cystobacter ferrugineus</i>                         | GCA_001887355.1      | WP_071905046.1    | WP_071905047.1    | EEGEI                                 | RLRFQ                           | NRPS-T- <sup>C</sup> DD      | <sup>N</sup> DD-C-NRPS         |
| <i>Melittangium lichenicola</i>                        | AJ557546.1           | CAD89777.1        | CAD89778.1        | EEGEL                                 | RLKYR                           | PKS-ACP- <sup>C</sup> DD     | <sup>N</sup> DD-C-NRPS         |
| <i>Cystobacter fuscus</i> strain DSM 52655             | GCA_002305875.1      | WP_095988360.1    | WP_095988359.1    | EELTL                                 | SLRLR                           | PKS-ACP- <sup>C</sup> DD     | <sup>N</sup> DD-C-NRPS         |
| <i>Stigmatella aurantiaca</i> DW4/3-1                  | GCA_000165485.1      | ADO71804.1        | ADO71805.1        | EEGEL                                 | RLKYR                           | PKS-ACP- <sup>C</sup> DD     | <sup>N</sup> DD-C-NRPS         |
| <i>Acidobacteria bacterium</i> SCN 69-37               | GCA_001724025.1      | ODS52927.1        | ODS52926.1        | EEIDL                                 | RLRVS                           | PKS-ACP- <sup>C</sup> DD     | <sup>N</sup> DD-C-NRPS         |
| <i>Mycolicibacterium bacteremicum</i>                  | GCA_002086115.1      | ORA04543.1        | ORA04542.1        | EEIEL                                 | RLRLN                           | NRPS-T- <sup>C</sup> DD      | <sup>N</sup> DD-TE             |
| <i>Herpetosiphon aurantiacus</i> DSM 785               | GCA_000018565.1      | ABX04503.1        | ABX04504.1        | EEIEL                                 | NLRVN                           | PKS-ACP- <sup>C</sup> DD     | <sup>N</sup> DD-C-NRPS         |
| <i>Microcystis aeruginosa</i> K-139                    | AB481215.1           | BAH22764.1        | BAH22765.1        | EDGEL                                 | KLRFQ                           | NRPS-T- <sup>C</sup> DD      | <sup>N</sup> DD-C-NRPS         |
| <i>Microcystis</i> sp. NIVA-CYA 172/5                  | DQ075244.1           | AAZ03552.1        | AAZ03553.1        | EEGEL                                 | KLRYR                           | NRPS-T- <sup>C</sup> DD      | <sup>N</sup> DD-DH stand alone |
| <i>Nostoc</i> sp. CENA543                              | GCA_002896875.1      | WP_103137408.1    | WP_103137407.1    | EEDYL                                 | QLRYR                           | (A?-KR)-ACP- <sup>C</sup> DD | <sup>N</sup> DD-C-NRPS         |
| <i>Planktothrix agardhii</i> NIES-205                  | EU109504.1           | ABW84365.1        | ABW84366.1        | EEGEL                                 | KLRYQ                           | NRPS-T- <sup>C</sup> DD      | <sup>N</sup> DD-C-NRPS         |
| <i>Duganella sacchari</i>                              | GCA_900143065.1      | SHM78877.1        | SHM78841.1        | TTIRI                                 | ELVLE                           | NRPS-T- <sup>C</sup> DD      | <sup>N</sup> DD-C-NRPS         |
| <i>Janthinobacterium</i> sp. HH01                      | GCA_000335815.1      | WP_008447581.1    | WP_008447582.1    | KRVRI                                 | ELVLD                           | NRPS-T- <sup>C</sup> DD      | <sup>N</sup> DD-C-NRPS         |
| <i>Paenibacillus elgii</i> B69                         | GCA_900188505.1      | WP_088834641.1    | WP_088834640.1    | EGVLE                                 | KLRFQ                           | T-OxRed- <sup>C</sup> DD     | <sup>N</sup> DD-C-NRPS-PKS     |
| <i>Paenibacillus larvae</i> subsp. <i>pulvifaciens</i> | GCA_002082155.1      | WP_083039736.1    | WP_083039734.1    | EEGIL                                 | NLRFQ                           | T-OxRed- <sup>C</sup> DD     | <sup>N</sup> DD-C-NRPS         |
| <i>Paenibacillus tyrfis</i>                            | GCA_000722545.1      | WP_051775011.1    | WP_051775010.1    | EGVLE                                 | KLRFQ                           | T-OxRed- <sup>C</sup> DD     | <sup>N</sup> DD-C-NRPS-PKS     |

\*the  $\beta$ -sheet position refers to the Supplementary Figure 2 nomenclature in contrast to the covalently linked NMR structure position designation.



**Supplementary Table 4.** HR-MS data of synthesized short peptides.

| peptide        | sum formula                                                      | calc [M+2H] <sup>2+</sup> | found [M+2H] <sup>2+</sup> | Δ ppm |
|----------------|------------------------------------------------------------------|---------------------------|----------------------------|-------|
| QEYLRGEA       | C <sub>41</sub> H <sub>64</sub> N <sub>12</sub> O <sub>15</sub>  | 483.2380                  | 483.2382                   | -0.5  |
| QEYLRGEI       | C <sub>44</sub> H <sub>70</sub> N <sub>12</sub> O <sub>15</sub>  | 504.2615                  | 504.2619                   | -0.9  |
| QEYLRGRI       | C <sub>45</sub> H <sub>75</sub> N <sub>15</sub> O <sub>13</sub>  | 517.7907                  | 517.7905                   | 0.4   |
| QEYLEGEI       | C <sub>43</sub> H <sub>65</sub> N <sub>9</sub> O <sub>17</sub>   | 490.7322                  | 490.7319                   | 0.5   |
| QEYLRAEI       | C <sub>45</sub> H <sub>72</sub> N <sub>12</sub> O <sub>15</sub>  | 511.2693                  | 511.2698                   | -0.9  |
| QEYARGEI       | C <sub>41</sub> H <sub>64</sub> N <sub>12</sub> O <sub>15</sub>  | 483.2380                  | 483.2382                   | -0.5  |
| QEYLRGAI       | C <sub>42</sub> H <sub>68</sub> N <sub>12</sub> O <sub>13</sub>  | 475.2587                  | 475.2587                   | 0.1   |
| YIHLLKEKRKHFQA | C <sub>85</sub> H <sub>135</sub> N <sub>25</sub> O <sub>19</sub> | 906.0256                  | 906.0247                   | 0.9   |
| YQKLLRRGEI     | C <sub>51</sub> H <sub>86</sub> N <sub>14</sub> O <sub>14</sub>  | 560.3297                  | 560.3291                   | 1.0   |
| QKLLRGEI       | C <sub>42</sub> H <sub>77</sub> N <sub>13</sub> O <sub>12</sub>  | 478.7980                  | 478.7981                   | -0.2  |

**Supplementary Table 5.** Bacterial strains used in this study.

| Strain                      | Relevant Genotype                                                                                                                                                                                                                                                      | Reference/Strain No. |
|-----------------------------|------------------------------------------------------------------------------------------------------------------------------------------------------------------------------------------------------------------------------------------------------------------------|----------------------|
| <i>E. coli</i><br>DH10BMtaA | F <sup>-</sup> <i>mcrA</i> , Δ( <i>mrr-hsdRMS-mcrBC</i> ), Φ80/ <i>lacZ</i> ΔM15, Δ <i>lacX74</i> , <i>recA1</i> , <i>endA1</i> , <i>araD139</i> , Δ( <i>ara leu</i> )7697, <i>galU</i> , <i>galK</i> , <i>rpsL</i> , <i>nupG</i> , λ <sup>-</sup> , <i>entD::mtaA</i> | 1, 4                 |
| BL21 GOLD (DE)              | <i>E. coli</i> B F <sup>-</sup> <i>ompT hsdS</i> (r <sub>B</sub> <sup>-</sup> m <sub>B</sub> <sup>-</sup> ) <i>dcm</i> <sup>+</sup> Tet <sup>r</sup> <i>gal</i> λ(DE3) <i>endA Hte</i>                                                                                 | Agilent              |
| <i>Xenorhabdus stockiae</i> | Wild type                                                                                                                                                                                                                                                              | KJ12.1               |

**Supplementary Table 6. Primers used in this study.**

| Primer          | Sequence (5'-3')                                       | Targeting DNA fragment                                                                                                                                    | Plasmid  |
|-----------------|--------------------------------------------------------|-----------------------------------------------------------------------------------------------------------------------------------------------------------|----------|
| hSUMO_fw        | TTAAGAAGGAGATATACATATGGCTAGCGG<br>TCATCCATC            | pET11a-mod-His6<br>SUMO-Nis197-226                                                                                                                        |          |
| hSUMO_rev       | CCACCAATCTGTTCACGATG                                   |                                                                                                                                                           | pET11a-  |
| pET11a-for      | TAAGGATCCGGCTGCTAAC                                    | pET11a (pCK_0415)                                                                                                                                         | modified |
| pET11a-rev      | ATGTATATCTCCTTCTTAAAG                                  |                                                                                                                                                           |          |
| ck0011          | CCATCGTGAACAGATTGGTGGTATGATAG<br>ATGCAGCGCAGAT         | <i>Kj12C<sup>-NDD</sup></i> from <i>X.</i><br><i>stockiae</i> KJ12.1 (192 bp)                                                                             |          |
| ck0010          | CTTTGTTAGCAGCCGGATCCTTATTTAGTT<br>TGTTCTTCTGAATCAAGCT  | pET11a (mod) vector<br>backbone (5,935 bp)                                                                                                                | pCK_0500 |
| pET11a-for      | TAAGGATCCGGCTGCTAAC                                    |                                                                                                                                                           |          |
| pET11a-smt3-rev | ATGTATATCTCCTTCTTAAAGTAAACAAAA<br>TTATTTCTA            |                                                                                                                                                           |          |
| ck0058          | CATCGTGAACAGATTGGTGGTATGAAGAA<br>TGCCGCTCAA            | <i>Kj12C<sup>-NDD</sup></i> from <i>X.</i><br><i>stockiae</i> KJ12.1 (192 bp)                                                                             |          |
| ck0059          | TTTGTAGCAGCCGGATCCTTATTGTGTTT<br>CTTCTTTTGCATCG        | pET11a (mod) vector<br>backbone (5,935 bp)                                                                                                                | pCK_0533 |
| pET11a-for      | TAAGGATCCGGCTGCTAAC                                    |                                                                                                                                                           |          |
| pET11a-smt3-rev | ATGTATATCTCCTTCTTAAAGTAAACAAAA<br>TTATTTCTA            |                                                                                                                                                           |          |
| ck0060          | CATCGTGAACAGATTGGTGGTATGAAAAAT<br>GCAGCTAAGATTGTG      | <i>Kj12B<sup>-NDD</sup></i> from <i>X.</i><br><i>stockiae</i> KJ12.1 (192 bp)                                                                             |          |
| ck0061          | TTTGTAGCAGCCGGATCCTTACGATTCTT<br>CTTCTGATTCAAGCT       | pET11a (mod) vector<br>backbone (5,935 bp)                                                                                                                | pCK_0533 |
| pET11a-for      | TAAGGATCCGGCTGCTAAC                                    |                                                                                                                                                           |          |
| pET11a-smt3-rev | ATGTATATCTCCTTCTTAAAGTAAACAAAA<br>TTATTTCTA            |                                                                                                                                                           |          |
| ck0100          | GGATCGGGTTCGGGCAGTATGATAGATGC<br>AGCGCAGA              | pCK_0500 and<br>subsequent ligation of<br>the PCR product                                                                                                 | pCK_0540 |
| ck0101          | GGAACCTGAACCACTACCACCACCAATCT<br>GTTACGA               |                                                                                                                                                           |          |
| ck0102          | CCATCGTGAACAGATTGGTGGTCTTCTCA<br>AAGAAAAAAGAAAACATTTTC | pCK_0540, vector part<br>fused to                                                                                                                         |          |
| ck0103          | ATCCGGAACCTGAACCACTACCTATTTC<br>CCTCTTAAATATTCCTGAGATG |                                                                                                                                                           | pCK_0541 |
| ck0104          | GAAATAGGTAGTGGTTCAGGTTCCG                              | <i>Kj12C<sup>-NDD</sup></i>                                                                                                                               |          |
| ck0105          | GAGAAGACCACCAATCTGTTACAGAT                             |                                                                                                                                                           |          |
| ck0109          | GGATCGGGTTCGGGCAGTTAAGGATCCG<br>GCTGCTAAC              | pCK_0500 and<br>subsequent ligation of<br>the PCR product                                                                                                 | pCK_0544 |
| ck0110          | GGAACCTGAACCACTACCTTTAGTTTGTT<br>CTTCTGAATCAAGC        |                                                                                                                                                           |          |
| ck0111          | TTCCGGATCGGGTTCGGGCAGTCTTCTCA<br>AAGAAAAAAGAAAACATTTTC | pCK0544, vector part<br>fused to                                                                                                                          |          |
| ck0113          | GAAATATAAGGATCCGGCTGCTAAC                              |                                                                                                                                                           | pCK_0545 |
| ck0112          | TTTGTAGCAGCCGGATCCTTATTTTCAC<br>CTCTTAAATATTCCTGAGA    | <i>Kj12C<sup>-CDD</sup></i>                                                                                                                               |          |
| ck0115          | CTTCTCAAAGAAAAAAGAAAACATTTTCAG                         |                                                                                                                                                           |          |
| ck0359          | TATGAAACCAATCGTGATAGTATTCCATC                          | pCK_0534 as template,<br>introducing a K28E<br>codon change into<br><i>Kj12B<sup>-NDD</sup></i> from <i>X.</i><br><i>stockiae</i> KJ12.1 (192 bp)         | pCK_0630 |
| ck0360          | TTTTAGTTTATTATCGCTAACAAATAGAGTA<br>ATTCC               |                                                                                                                                                           |          |
| ck0359          | TATGAAACCAATCGTGATAGTATTCCATC                          | pCK_0534 as template,<br>introducing K28E and<br>K26Q codon changes<br>into <i>Kj12B<sup>-NDD</sup></i> from <i>X.</i><br><i>stockiae</i> KJ12.1 (192 bp) | pCK_0631 |
| ck0361          | TTGTAGTTTATTATCGCTAACAAATAGAGTA<br>ATTCC               |                                                                                                                                                           |          |
| ck0359          | TATGAAACCAATCGTGATAGTATTCCATC                          | pCK_0534 as template,<br>introducing K28E, K26Q<br>and K24R codon<br>changes into <i>Kj12B<sup>-NDD</sup></i>                                             | pCK_0632 |
| ck0363          | TTGTAGTCTATTATCGCTAACAAATAGAGTA<br>ATTCC               |                                                                                                                                                           |          |

|                               |                                                                     |                                                                                                                                                          |                                       |
|-------------------------------|---------------------------------------------------------------------|----------------------------------------------------------------------------------------------------------------------------------------------------------|---------------------------------------|
|                               |                                                                     | from <i>X. stockiae</i> KJ12.1 (192 bp)                                                                                                                  |                                       |
| ck0364                        | AATACGCAACCAGTCGTGACAGC                                             | pCK_0500 as template, introducing Q26K and E28A codon changes into <i>Kj12C<sup>-NDD</sup></i> from <i>X. stockiae</i> KJ12.1                            | pCK_0640                              |
| ck0365                        | TTAACCGATTGTTAACAACAATAGAGTAA<br>TCCC                               |                                                                                                                                                          |                                       |
| jw0075                        | CATCGTGAACAGATTGGTGGTAATGAAGA<br>TGATTTACGTCGGCAAACCTATG            | <i>Kj12B-Tdom<sup>-NDD</sup></i> from <i>X. stockiae</i> KJ12.1 (373 bp)                                                                                 |                                       |
| jw0076                        | TTTGTTAGCAGCCGGATCCTTATTTTAC<br>CTCTTAAATATTCCTGAGATGAATTTTGC       |                                                                                                                                                          | pJW58                                 |
| pET11a-for<br>pET11a-smt3-rev | TAAGGATCCGGCTGCTAAC<br>ATGTATATCTCCTTCTTAAAGTTAAACAAAA<br>TTATTTCTA |                                                                                                                                                          |                                       |
| SN_KJ12C_Ndd_F<br>w1          | TTAACTTTAATAAGGAGATATACCATGATAG<br>ATGCAGCGCAG                      | <i>Kj12C<sup>-NDD</sup>-Cterm</i> from <i>X. stockiae</i> KJ12.1 (192 bp)                                                                                |                                       |
| SN_KJ12C_Ndd_R<br>v1          | ATGTCCTGGAAAGTATAGTTCTCTCCATA<br>AAACTGGCTGATAC                     |                                                                                                                                                          | pCOLA-Kj12C-<br><sup>NDD</sup> -Cterm |
| SN_pCOLA_Ndd_F<br>w           | GAGAACCTATACTTCCAGGGACATCACCA<br>TCATCACCACCTAATGCTTAAGTCGAACAG     | pCOLA_Duet                                                                                                                                               |                                       |
| SN_pCOLA_Ndd_<br>Rv           | GGTATATCTCCTTATTAAGTTAAAC                                           |                                                                                                                                                          |                                       |
| SN_KJ12C_w/o_F<br>w (5' Phos) | AATGGAAAAGTGCCTATTTTC                                               | <i>pCOLA-Kj12C<sup>-NDD</sup>-Cterm</i>                                                                                                                  | pCOLA-Kj12C-<br>Cterm                 |
| SN_KJ12C_w/o_Rv               | CATGGTATATCTCCTTATTAAGTTAAAC                                        |                                                                                                                                                          |                                       |
| XC3-Fw                        | ATGAAGAATGCCGCTCAAATTGTGGATG                                        | <i>kj12A</i> from <i>X. stockiae</i> KJ12.1 (3,538 bp)                                                                                                   |                                       |
| XC204-Rv                      | ACAATCTTAGCTGCATTTTTTCATATATGACC<br>TTCCAATAG                       |                                                                                                                                                          |                                       |
| XC204-Fw                      | AGGTCATATATGAAAAATGCAGCTAAGATT<br>GTG                               | The region encoding KJ12BC (A-MT:VietB) from <i>X. stockiae</i> KJ12.1 (6,275 bp)                                                                        |                                       |
| XC3-Rv                        | TTATCCATAAAACTGGCTGATACTCTC                                         |                                                                                                                                                          | pCX178                                |
| XC4-Fw                        | AAGAGAGTATCAGCCAGTTTTATGGATAAC<br>AATTAATCATCGGCTCGTA               | pCOLA-ara-tacl vector backbone (3,368 bp)                                                                                                                |                                       |
| XC4-Rv                        | AGCCTCATCCACAATTTGAGCGGCATTCT<br>TCATGGAATTCCTCCTGTTAGCCC           |                                                                                                                                                          |                                       |
| XC3-Fw                        | ATGAAGAATGCCGCTCAAATTGTGGATG                                        | <i>kj12A</i> with double point mutation on <sup>C</sup> DD (E1169R and H1171E) from <i>X. stockiae</i> KJ12.1 (3,530 bp)                                 |                                       |
| XC280-Rv                      | AGCTGCATTTTTTCATATTTACCTCTCAATA<br>G                                |                                                                                                                                                          |                                       |
| XC280-Fw                      | TGAGAGGTGAAATATGAAAAATGCAGCTA<br>AG                                 | <i>kj12BC</i> from <i>X. stockiae</i> KJ12.1 (6,305 bp)                                                                                                  |                                       |
| XC3-Rv                        | TTATCCATAAAACTGGCTGATACTCTC                                         |                                                                                                                                                          | pCX242                                |
| XC4-Fw                        | AAGAGAGTATCAGCCAGTTTTATGGATAAC<br>AATTAATCATCGGCTCGTA               | pCOLA-ara-tacl vector backbone (3,368 bp)                                                                                                                |                                       |
| XC4-Rv                        | AGCCTCATCCACAATTTGAGCGGCATTCT<br>TCATGGAATTCCTCCTGTTAGCCC           |                                                                                                                                                          |                                       |
| XC3-Fw                        | ATGAAGAATGCCGCTCAAATTGTGGATG                                        | DNA fragment encoding <i>Kj12A<sup>-CDD</sup></i> with double point mutations <i>kj12A</i> (E1169R and H1171E) from <i>X. stockiae</i> KJ12.1 (3,519 bp) |                                       |
| XC282-Rv                      | AGCTTCGTTCAACAATCTTAGC                                              |                                                                                                                                                          | pCX244                                |
| XC282-Fw                      | AGGTGAAATATGACAATTAATCATCGGCTC<br>G                                 | pCOLA-ara-tacl vector backbone (3,368 bp)                                                                                                                |                                       |
| XC4-Rv                        | AGCTTCGTTCAACAATCTTAGCTGCATTTTT<br>CATGGAATTCCTCCTGTTAGCC           |                                                                                                                                                          |                                       |
| XC3-Fw                        | ATGAAGAATGCCGCTCAAATTGTGGATG                                        | <i>kj12A</i> with double point mutation on <sup>C</sup> DD (E1169R and H1171E) from <i>X. stockiae</i> KJ12.1 (3,530 bp)                                 |                                       |
| XC280-Rv                      | AGCTGCATTTTTTCATATTTACCTCTCAATA<br>G                                |                                                                                                                                                          |                                       |

|          |                                                              |                                                                                                                                                    |        |
|----------|--------------------------------------------------------------|----------------------------------------------------------------------------------------------------------------------------------------------------|--------|
| XC280-Fw | TGAGAGGTGAAATATGAAAAATGCAGCTA<br>AG                          | <i>kj12BC (A-MT:vietB)</i><br>from pCX74 (6,305 bp)                                                                                                | pCX253 |
| XC3-Rv   | TTATCCATAAACTGGCTGATACTCTC                                   |                                                                                                                                                    |        |
| XC4-Fw   | AAGAGAGTATCAGCCAGTTTTATGGATAAC                               | pCOLA-ara-tacl vector<br>backbone (3,368 bp)                                                                                                       |        |
| XC4-Rv   | AGCCTCATCCACAATTTGAGCGGCATTCT<br>TCATGGAATTCCTCCTGTTAGCCC    |                                                                                                                                                    |        |
| XC295-Fw | AGACTAAAATATGAAACCAATCGTGATAGT<br>ATTCCATC                   | DNA fragment encoding<br>Kj12B (A-MT:VietB) with<br>double point mutations<br>(K24R and K28E) on<br><sup>N</sup> DD from pCX88 (4,637<br>bp)       | pCX256 |
| XC30-Rv  | TCATATTTACCTCTTAAATATTCCTG                                   |                                                                                                                                                    |        |
| XC31-Fw  | ATCTCAGGAATATTTAAGAGGTGAAATATG<br>ACAATTAATCATCGGCTCGTATAATG | pCX16 vector backbone<br>(3,212 bp)                                                                                                                |        |
| XC295-Rv | ACTATCACGATTGGTTTCATATTTAGTCTA<br>TTATCGCTAACAAATAGAG        |                                                                                                                                                    |        |
| XC296-Fw | ATGAAACCAATCGTGATAGTATTC                                     | DNA fragment encoding<br>Kj12B (A-MT:VietB) with<br>single point mutation<br>(K28E) on <sup>N</sup> DD from<br>pCX88 (4,637 bp)                    | pCX257 |
| XC30-Rv  | TCATATTTACCTCTTAAATATTCCTG                                   |                                                                                                                                                    |        |
| XC31-Fw  | ATCTCAGGAATATTTAAGAGGTGAAATATG<br>ACAATTAATCATCGGCTCGTATAATG | pCX16 vector backbone<br>(3,212 bp)                                                                                                                |        |
| XC296-Rv | ATGGAATACTATCACGATTGGTTTCATATTT<br>TAGTTTATTATCGCTAAC        |                                                                                                                                                    |        |
| XC297-Fw | AGACTACAATATGAAACCAATCGTGATAGT<br>ATTCCATC                   | DNA fragment encoding<br>Kj12B (A-MT:VietB) with<br>triple point mutations<br>(K24R, K26Q and K28E)<br>on <sup>N</sup> DD from pCX88<br>(4,637 bp) | pCX258 |
| XC30-Rv  | TCATATTTACCTCTTAAATATTCCTG                                   |                                                                                                                                                    |        |
| XC31-Fw  | ATCTCAGGAATATTTAAGAGGTGAAATATG<br>ACAATTAATCATCGGCTCGTATAATG | pCX16 vector backbone<br>(3,212 bp)                                                                                                                |        |
| XC297-Rv | ACTATCACGATTGGTTTCATATTGTAGTCTA<br>TTATCGCTAACAAATAGAG       |                                                                                                                                                    |        |
| XC300-Fw | ACTACAATATGAAACCAATCGTGATAGTATT<br>CCATC                     | DNA fragment encoding<br>Kj12B (A-MT:VietB) with<br>double point mutations<br>(K26Q and K28E) on<br><sup>N</sup> DD from pCX88 (4,637<br>bp)       | pCX261 |
| XC30-Rv  | TCATATTTACCTCTTAAATATTCCTG                                   |                                                                                                                                                    |        |
| XC31-Fw  | ATCTCAGGAATATTTAAGAGGTGAAATATG<br>ACAATTAATCATCGGCTCGTATAATG | pCX16 vector backbone<br>(3,212 bp)                                                                                                                |        |
| XC300-Rv | ACTATCACGATTGGTTTCATATTGTAGTTTA<br>TTATCGCTAACAAATAGAG       |                                                                                                                                                    |        |
| XC301-Fw | ACTACAATATAAAACCAATCGTGATAGTATT<br>CCATC                     | DNA fragment encoding<br>Kj12B (A-MT:VietB) with<br>single point mutation<br>(K26Q) on <sup>N</sup> DD from<br>pCX88 (4,637 bp)                    | pCX262 |
| XC30-Rv  | TCATATTTACCTCTTAAATATTCCTG                                   |                                                                                                                                                    |        |
| XC31-Fw  | ATCTCAGGAATATTTAAGAGGTGAAATATG<br>ACAATTAATCATCGGCTCGTATAATG | pCX16 vector backbone<br>(3,212 bp)                                                                                                                |        |
| XC301-Rv | ACTATCACGATTGGTTTATATTGTAGTTTA<br>TTATCGCTAACAAATAGAG        |                                                                                                                                                    |        |
| XC304-Fw | ACAATACAAAACCAGTCGTGACAGCATTCC<br>C                          | DNA fragment encoding<br>Kj12C with single point<br>mutation (E28K) on <sup>N</sup> DD<br>from pCX19 (1,510 bp)                                    | pCX267 |
| XC3-Rv   | TTATCCATAAACTGGCTGATACTCTC                                   |                                                                                                                                                    |        |

|          |                                                                           |                                                                                                                  |        |
|----------|---------------------------------------------------------------------------|------------------------------------------------------------------------------------------------------------------|--------|
| XC4-Fw   | AAGAGAGTATCAGCCAGTTTTATGGATAAC                                            | pCDF-ara-tacI vector backbone (3,466 bp)                                                                         |        |
| XC304-Rv | AATTAATCATCGGCTCGTA<br>ATGCTGTCACGACTGGTTTTGTATTGTAAC<br>CGATTGTTAAC      |                                                                                                                  |        |
| XC305-Fw | ACAATACGCAACCAGTCGTGACAGCATTCC                                            | DNA fragment encoding Kj12C with single point mutation (E28A) on <sup>N</sup> DD from pCX19 (1,510 bp)           | pCX268 |
| XC3-Rv   | C<br>TTATCCATAAAACTGGCTGATACTCTC                                          |                                                                                                                  |        |
| XC4-Fw   | AAGAGAGTATCAGCCAGTTTTATGGATAAC                                            | pCDF-ara-tacI vector backbone (3,466 bp)                                                                         |        |
| XC305-Rv | AATTAATCATCGGCTCGTA<br>ATGCTGTCACGACTGGTTGCGTATTGTAA<br>CCGATTGTTAAC      |                                                                                                                  |        |
| XC306-Fw | ATCGGTTAAAATACAAAACCAGTCGTGAC                                             | DNA fragment encoding Kj12C with double point mutations (Q26E and E28A) on <sup>N</sup> DD from pCX19 (1,510 bp) | pCX269 |
| XC3-Rv   | AGCATTCC<br>TTATCCATAAAACTGGCTGATACTCTC                                   |                                                                                                                  |        |
| XC4-Fw   | AAGAGAGTATCAGCCAGTTTTATGGATAAC                                            | pCDF-ara-tacI vector backbone (3,466 bp)                                                                         |        |
| XC306-Rv | AATTAATCATCGGCTCGTA<br>TGTCACGACTGGTTTTGTATTTTAACCGAT<br>TGTTAACAACAAATAG |                                                                                                                  |        |

**Supplementary Table 7. Plasmids used in this study.**

| Plasmid                       | Description                                                                                                                                                                                                                                  | References |
|-------------------------------|----------------------------------------------------------------------------------------------------------------------------------------------------------------------------------------------------------------------------------------------|------------|
| pET11a modified               | 5,938 bp, modified from pET11a, the operon under the control of T7 promoter was modified by introduction of N-terminal His × 6-smt3 tag, His x 6-smt3 sequence from a plasmid used in another study (Hacker, Christ 2015) (Am <sup>R</sup> ) | This study |
| pCK_0500                      | 6,127 bp, vector, the Kj12C- <sup>N</sup> DD was fused N-terminally to <i>smt3</i> into pET11a-modified, under control of T7 promoter (Am <sup>R</sup> )                                                                                     | This study |
| pCK_0533                      | 6,127 bp, vector, KJ12A- <sup>N</sup> DD was fused N-terminally to <i>smt3</i> into pET11a-modified, under control of T7 promoter (Am <sup>R</sup> )                                                                                         | This study |
| pCK_0534                      | 6,124 bp, vector fusing the KJ12B- <sup>N</sup> DD N-terminally to <i>smt3</i> into pET11a-modified, under control of T7 promoter (Am <sup>R</sup> )                                                                                         | This study |
| pCK_0540                      | 6,163 bp, vector, adding 12 GS-codons in frame N-terminally to <i>smt3</i> and C-terminally to the KJ12C- <sup>N</sup> DD into pCK_0500, under control of T7 promoter (Am <sup>R</sup> )                                                     | This study |
| pCK_0541                      | 6,235 bp, vector, the KJ12B- <sup>C</sup> DD was fused in frame C-terminally to <i>smt3</i> and N-terminally to KJ12C- <sup>N</sup> DD originating from vector vector pCK_0540, under control of T7 promoter (Am <sup>R</sup> )              | This study |
| pCK_0544                      | 6,163 bp, vector, adding 12 GS-codons in frame C-terminally to KJ12C- <sup>N</sup> DD from pCK_0500, under control of T7 promoter (Am <sup>R</sup> )                                                                                         | This study |
| pCK_0545                      | 6,235 bp, vector, the KJ12B- <sup>C</sup> DD was fused in frame N-terminally to the 12-GS-linker form pCK_0544, under control of T7 promoter (Am <sup>R</sup> )                                                                              | This study |
| pCK_0630                      | 6,124 bp, vector based on pCK_0534, one codon change was introduced into the KJ12B- <sup>N</sup> DD domain (K28E in respect to the KJ12B- <sup>N</sup> DD)                                                                                   | This study |
| pCK_0631                      | 6,124 bp, vector based on pCK_0534, two codon changes were introduced into the KJ12B- <sup>N</sup> DD domain (K26Q and K28E, in respect to the KJ12B- <sup>N</sup> DD).                                                                      | This study |
| pCK_0632                      | 6,124 bp, vector based on pCK_0534, three codon changes were introduced into the KJ12B- <sup>N</sup> DD domain (K24R, K26Q and K28E, in respect to the KJ12B- <sup>N</sup> DD).                                                              | This study |
| pCK_0640                      | 6,127 bp, vector based on pCK_500, two codon changes were introduced resulting into the KJ12C- <sup>N</sup> DD domain (Q26K and E28A, in respect to the KJ12C- <sup>N</sup> DD).                                                             | This study |
| pJW58                         | 6,268 bp, vector, KJ12B-Tdom- <sup>C</sup> DD was fused N-terminally to <i>smt3</i> into pET11a-modified, under control of T7 promoter (Am <sup>R</sup> )                                                                                    | This study |
| pKj12C-Cterm- <sup>N</sup> DD | 5252 pb, pCOLA vector, KJ12C-Cterm- <sup>N</sup> DD was fused C-terminal with a His <sub>6</sub> -tag and a TEV cleavage site, under control of a T7 promoter (Km <sup>R</sup> )                                                             | This study |
| pKj12C-Cterm- <sup>N</sup> DD | 5015 pb, pCOLA vector, KJ12C-Cterm was fused C-terminal with a His <sub>6</sub> -tag and a TEV cleavage site, under control of a T7 promoter (Km <sup>R</sup> )                                                                              | This study |
| pCX16                         | 3,189 bp, modified from pCOLA-ara-tacI with Km <sup>R</sup> replaced by chloramphenicol resistance gene (Cm <sup>R</sup> )                                                                                                                   | 1          |
| pCX88                         | 4,707 bp, <i>kj12B</i> from <i>X. stokiae</i> KJ12.1 with A-MT gene replaced by the A-MT encoding gene from <i>vietB</i> in <i>X. vietnamensis</i> DSM 22392, assembled into pCX16 (Cm <sup>R</sup> )                                        | 1          |
| pCX74                         | 6,287 bp, <i>kj12BC</i> from <i>X. stokiae</i> KJ12.1 with A-MT gene replaced by the A-MT encoding gene from <i>vietB</i> in <i>X. vietnamensis</i> DSM 22392, assembled into pCX16 (Cm <sup>R</sup> )                                       | 1          |
| pCX26                         | 7,896 bp, <i>kj12B</i> from <i>X. stokiae</i> KJ12.1, assembled into pCX16, (Cm <sup>R</sup> )                                                                                                                                               | 1          |

| Plasmid | Description                                                                                                                                                                                                                                                                | References |
|---------|----------------------------------------------------------------------------------------------------------------------------------------------------------------------------------------------------------------------------------------------------------------------------|------------|
| pCX19   | 5,005 bp, <i>kj12C</i> from <i>X. stockiae</i> KJ12.1 assembled into pCDF-ara-tacI, (Sm <sup>R</sup> )                                                                                                                                                                     | 1          |
| pCX3    | 16,107 bp, <i>kj12</i> gene cluster from <i>X. stockiae</i> KJ12.1 genomic DNA assembled into pCOLA-ara-tacI, Km <sup>R</sup>                                                                                                                                              | 1          |
| pCX178  | 13,032 bp, DNA fragment encoding Kj12ABC with A-MT domain replaced by that of VietB from <i>X. vietnamensis</i> for Leu specificity (A-MT:VietB), assembled into pCOLA-ara-tacI (Km <sup>R</sup> )                                                                         | This study |
| pCX242  | 13,032 bp, DNA fragment encoding Kj12ABC from <i>X. stockiae</i> KJ12.1 with double point mutations on Kj12A- <sup>C</sup> DD (E1169R and H1171E), assembled into pCOLA-ara-tacI (Km <sup>R</sup> )                                                                        | This study |
| pCX244  | 6,825 bp, DNA fragment encoding Kj12A from <i>X. stockiae</i> KJ12.1 with point mutation on Kj12A- <sup>C</sup> DD (E1169R and H1171E), assembled into pCOLA-ara-tacI (Km <sup>R</sup> )                                                                                   | This study |
| pCX253  | 13,032 bp, DNA fragment encoding Kj12ABC with A-MT domain exchanged against that of VietB from <i>X. vietnamensis</i> for Leu specificity (A-MT:VietB ) and point mutation on Kj12A- <sup>C</sup> DD (E1169R and H1171E), assembled into pCOLA-ara-tacI (Km <sup>R</sup> ) | This study |
| pCX256  | 7,857 bp, DNA fragment encoding Kj12B (A-MT:VietB ) with double point mutations on Kj12B- <sup>N</sup> DD (K28E and K24R), assembled into pCX16 (Cm <sup>R</sup> )                                                                                                         | This study |
| pCX257  | 7,857 bp, DNA fragment encoding Kj12B (A-MT:VietB ) with single point mutation on Kj12B- <sup>N</sup> DD (K28E), assembled into pCX16 (Cm <sup>R</sup> )                                                                                                                   | This study |
| pCX258  | 7,857 bp, DNA fragment encoding Kj12B (A-MT:VietB ) with triple point mutations on Kj12B- <sup>N</sup> DD (K28E, K24R and K26Q), assembled into pCX16 (Cm <sup>R</sup> )                                                                                                   | This study |
| pCX261  | 7,857 bp, DNA fragment encoding Kj12B (A-MT:VietB ) with double point mutations on Kj12B- <sup>N</sup> DD (K26Q and K28E), assembled into pCX16 (Cm <sup>R</sup> )                                                                                                         | This study |
| pCX262  | 7,857 bp, DNA fragment encoding Kj12B (A-MT:VietB ) with single point mutation on Kj12B- <sup>N</sup> DD (K26Q), assembled into pCX16 (Cm <sup>R</sup> )                                                                                                                   | This study |
| pCX267  | 4,949 bp, DNA fragment encoding Kj12C from <i>X. stockiae</i> KJ12.1 with single point mutation on Kj12C- <sup>N</sup> DD (E28K), assembled into pCDF-ara-tacI (Sm <sup>R</sup> )                                                                                          | This study |
| pCX268  | 4,949 bp, DNA fragment encoding Kj12C from <i>X. stockiae</i> KJ12.1 with single point mutation on Kj12C- <sup>N</sup> DD (E28A), assembled into pCDF-ara-tacI (Sm <sup>R</sup> )                                                                                          | This study |
| pCX269  | 4,949 bp, DNA fragment encoding Kj12C from <i>X. stockiae</i> KJ12.1 with double point mutations on Kj12C- <sup>N</sup> DD (Q26K and E28A), assembled into pCDF-ara-tacI (Sm <sup>R</sup> )                                                                                | This study |

Am<sup>R</sup>: ampicillin resistance; Km<sup>R</sup> : kanamycin resistance; Cm<sup>R</sup>: chloramphenicol resistance; Sm<sup>R</sup>: spectinomycin resistance

## Supplementary References

1. Cai, X. *et al.* Entomopathogenic bacteria use multiple mechanisms for bioactive peptide library design. *Nat Chem* **9**, 379–386 (2017).
2. Tobias, N. J. *et al.* Natural product diversity associated with the nematode symbionts *Photorhabdus* and *Xenorhabdus*. *Nature Microbiology* **2**, 1676–1685 (2017).
3. Kronenwerth, M. *et al.* Characterisation of taxllalids A-G; natural products from *Xenorhabdus indica*. *Chem. Eur. J.* **20**, 17478–17487 (2014).
4. Edgar, R. C. MUSCLE: a multiple sequence alignment method with reduced time and space complexity. *BMC Bioinformatics* **5**, 113 (2004).
5. Edgar, R. C. MUSCLE: multiple sequence alignment with high accuracy and high throughput. *Nucleic Acids Res.* **32**, 1792–1797 (2004).
6. Hacker, C. *et al.* The Solution Structure of the Lantibiotic Immunity Protein NisI and Its Interactions with Nisin. *Journal of Biological Chemistry* **290**, 28869–28886 (2015).
7. Richter, C. D., Nietlispach, D., Broadhurst, R. W. & Weissman, K. J. Multienzyme docking in hybrid megasynthetases. *Nat Chem Biol* **4**, 75–81 (2008).
8. Dowling, D. P. *et al.* Structural elements of an NRPS cyclization domain and its intermodule docking domain. *Proc. Natl. Acad. Sci. U.S.A.* **113**, 12432–12437 (2016).
9. Kelly, S. M. & Price, N. C. The use of circular dichroism in the investigation of protein structure and function. *Curr. Protein Pept. Sci.* **1**, 349–384 (2000).
